# Supplementary material for: Expanding Limits of Laser-Ablation U-Pb Calcite Geochronology
Source: Copernicus journal article supplement (doi:10.5194/gchron-2020-17), 2020-06-30
Supplement: Supplementary file 1 [file DR1 U-Pb data.xlsx]

## Sheet: all data values
Sample #	U ppm	Th ppm	238U/206Pb	2σ	207Pb/206Pb	2σ	rho	Used in Isochron
Experiment F (P3D; 65 µm; 238 on Faraday)
C258-11	0.0119	0.004	7.53333	3.58562	0.49	0.042155	0.0685076	X
C258-17	0.0109	0.012	4.6888	1.42028	0.533	0.0866582	0.097323	X
C258-20	0.0035	0.02	4.5749	1.09835	0.51	0.250208	0.00727917	X
C258-22	0.0185	0.02	1.73846	0.674265	0.765	0.0447	0.194226	X
C258-25	0.0271	0.066	4.97797	1.59841	0.522	0.0461952	0.141559	X
C258-26	0.0124	0.005	0.653179	0.311317	0.811	0.0220927	0.131638	X
C258-31	0.012	0.005	3.13889	1.1443	0.671	0.0890174	0.129427	X
C258-42	0.0303	0.009	7.01863	1.94997	0.444	0.0596645	0.0754122	X
C258-46	0.0186	-0.005	6.80723	2.2404	0.579	0.0857852	0.125291	X
C258-47	0.0121	0.021	2.7561	1.21782	0.724	0.044426	0.210832	X
C258-48	0.034	0.005	8.82812	3.75043	0.457	0.0597038	0.0491459	X
C258-49	0.0417	0.002	9.74138	2.15519	0.353	0.0317938	0.147534	X
C258-51	0.0479	0.01	7.84722	1.68126	0.389	0.0417316	0.122642	X
C258-52	0.07	0.035	1.94828	0.945578	0.741	0.0473776	0.438896	X
C258-56	0.0629	0.05	1.50667	0.487983	0.742	0.043603	0.652985	X
C258-58	0.12	0.014	8.18841	1.65357	0.399	0.074429	0.369102	X
C258-59	0.0241	0.007	3.57595	0.658453	0.667	0.0431156	0.293594	X
C258-61	0.0657	-0.004	11.0784	1.3169	0.204	0.0223751	0.0815175	X
C258-63	0.105	0.021	4.50199	1.31088	0.609	0.0779574	0.541042	X
C258-66	0.06	0.017	7.73973	1.73996	0.378	0.0743852	0.294012	X
C258-67	0.0838	0.013	10.6604	1.3193	0.2076	0.0102761	0.137048	X
C258-68	0.0155	0.001	6.56977	1.78747	0.435	0.0497664	0.167995	X
C258-69	0.0235	-0.008	1.63768	0.528541	0.744	0.0282385	0.18789	X
C258-70	0.0874	0.031	13.2785	1.06052	0.12	0.0132197	0.130322	X
C258-71	0.0133	0.007	2.40426	0.575396	0.761	0.0275799	0.243301	X
C258-72	0.0751	-0.002	12.1505	1.56029	0.227	0.0521978	0.275812	X
C258-73	0.0786	0.011	14.125	2.40151	0.115	0.0141877	0.0970979	X
C258-74	0.0774	0.024	12.5556	1.5298	0.107	0.0151519	0.104881	X
C258-76	0.0176	-0.01	12.5556	4.37002	0.33	0.0514253	0.097638	X
C258-79	0.0119	0.041	0.693251	0.303951	0.767	0.030188	0.0904863	X
C258-86	0.0128	0.028	0.562189	0.222741	0.838	0.0276568	0.357556	X
C258-89	0.038	0.002	9.57627	1.8485	0.366	0.0604449	0.328119	X
C258-92	0.029	0.003	10.5607	2.81355	0.369	0.0260665	0.114809	X
C258-93	0.041	0.03	3.56467	0.785158	0.667	0.0337484	0.522889	X
C258-95	0.0306	0.002	9.4958	1.58874	0.432	0.0556745	0.460641	X
C258-99	0.032	0.015	9.91228	1.6417	0.333	0.022986	0.250549	X
C258-101	0.051	0.038	10.367	2.80647	0.219	0.027353	0.304314	X
C258-102	0.0242	0.103	7.95775	3.60859	0.231	0.050213	0.0597241	X
C258-5	0.0093	-0.016	10.2727	3.30871	0.63	0.110719	0.129848
C258-9	0.0078	0.004	11.3	1.89423	0.5	0.150333	0.0294815
C258-14	0.033	-0.012	3.22857	1.21	0.75	0.04272	0.548396
C258-16	0.0338	0.01	10.9709	1.58888	0.363	0.0377055	0.310029
C258-18	0.019	-0.007	18.8333	6.03777	0.48	0.130354	0.0750304
C258-27	0.0479	0.011	4.34615	1.85155	0.768	0.0310633	0.641534
C258-29	0.0125	-0.004	3.89655	1.62409	0.804	0.0621174	0.043894
C258-30	0.013	0.074	13.1395	4.17719	0.823	0.0689923	0.138888
C258-39	0.226	0.029	28.25	7.89612	0.777	0.0223045	0.688548
C258-40	0.088	0.004	8.62595	3.18995	0.795	0.0279609	0.655107
C258-41	0.026	0.003	6.80723	1.71541	0.614	0.0534303	0.181919
C258-45	0.0129	-0.014	3.21023	0.755954	0.818	0.0738353	0.191513
C258-53	0.077	0.053	9.1129	4.2137	0.658	0.0392707	0.506392
C258-54	0.044	-0.024	11.7708	1.47156	0.432	0.0428795	0.117234
C258-57	0.0559	0.001	9.82609	2.77801	0.768	0.0293416	0.587001
C258-64	0.04	0.007	24.5652	6.52496	0.46	0.070602	0.122376
C258-65	0.061	0.015	31.6527	6.14762	0.365	0.0535004	0.156612
C258-78	0.048	0.038	18.8333	4.49421	0.476	0.0314743	0.165523
C258-87	0.0297	0.014	6.76647	1.93415	0.622	0.0701124	0.344361
C258-97	0.021	0	2.825	1.27907	0.552	0.0386119	0.0945585
C258-107	-0.0004	-0.003	17.9365	7.17394	0.5	0.280179	0.0054935
C273c-1	0.174	0.013	42.0074	3.50895	0.381	0.0358199	0.107841	X
C273c-2	0.146	0.004	39.3728	5.18947	0.405	0.0398323	0.257863	X
C273c-3	0.464	-0.011	57.1284	3.82347	0.228	0.0214894	0.182777	X
C273c-4	0.046	0.011	16.3768	4.81701	0.641	0.0401043	0.0875957	X
C273c-5	0.2236	0.001	47.5189	2.94406	0.356	0.0337594	0.194023	X
C273c-6	0.552	-0.015	60.9822	3.68724	0.215	0.0185065	0.212298	X
C273c-7	0.779	0.016	63.5546	3.54564	0.1682	0.00914147	0.400712	X
C273c-8	0.533	0.025	59.1623	3.5438	0.232	0.0166592	0.171614	X
C273c-9	0.0253	-0.01	10.463	4.19853	0.746	0.0784322	0.0919665	X
C273c-10	0.0104	0.009	5.38095	3.08658	0.759	0.0618905	0.0257025	X
C273c-11	0.779	0.005	67.1021	3.84241	0.1685	0.0097978	0.342149	X
C273c-12	0.473	0.013	63.7338	3.62383	0.221	0.0137309	0.101323	X
C273c-13	0.5655	0.003	63.9864	3.75017	0.187	0.0135273	0.442597	X
C273c-14	0.498	0.021	62.0538	3.66053	0.214	0.0185018	0.0933564	X
C273c-15	0.139	0.018	28.25	4.06692	0.486	0.0440849	0.301795	X
C273c-16	1.014	0	69.5385	3.60213	0.142	0.0102993	0.236592	X
C273c-17	0.952	0.005	70.3174	3.64527	0.139	0.00970662	0.351193	X
C273c-18	0.948	-0.015	69.969	3.77932	0.148	0.0133327	0.154693	X
C273c-19	0.638	0.021	64.0953	3.96035	0.2	0.0164924	0.329571	X
C273c-20	0.2139	0.008	45.749	2.9433	0.368	0.0270217	0.281074	X
C273c-21	1.146	-0.01	68.5264	3.70621	0.1477	0.00555123	0.338393	X
C273c-22	0.402	0.001	56.0238	3.2882	0.276	0.0226819	0.364048	X
C273c-23	0.222	0.008	35.9873	3.48097	0.49	0.0250008	0.332561	X
C273c-24	0.18	0.033	50.4464	3.86439	0.436	0.0448558	0.262562	X
C273c-25	0.073	0.033	27.8325	4.27734	0.568	0.0659852	0.253338	X
C273c-31	0.3378	0.008	60.4925	3.4618	0.241	0.0274269	0.0612354	X
C273c-32	0.251	0.003	52.5581	4.12373	0.335	0.0268494	0.395953	X
C273c-33	0.1704	0.034	46.888	4.3773	0.327	0.0346233	0.344868	X
C273c-34	0.0551	0.05	28.4635	4.59921	0.488	0.0895336	0.160852	X
C273c-35	0.0298	0.021	20.5455	4.59885	0.67	0.14064	0.135765	X
C273c-37	0.02	0.036	4.36293	1.56505	0.764	0.0619151	0.455576	X
C273c-40	0.0506	0.059	30.9589	5.23825	0.504	0.071712	0.27285	X
C273c-43	0.0162	0.022	12.2826	4.05201	0.73	0.120885	0.0430224	X
C273c-45	0.0191	0.021	12.5556	5.19976	0.81	0.121089	0.272677	X
C273c-48	0.0593	0.078	31.044	4.13986	0.544	0.0757851	0.366789	X
C273c-49	0.011	0.025	12.2826	5.24285	0.81	0.0835849	0.131312	X
C273c-51	0.0128	-0.019	4.03571	1.88456	0.716	0.0960732	0.146925	X
C273c-55	0.0273	0.021	18.8333	4.1878	0.68	0.120768	0.281729	X
C273c-56	0.0175	0.016	22.0703	4.28279	0.72	0.140739	0.0288604	X
C273c-59	0.0196	0	15.4795	6.61887	0.67	0.16056	0.0438129	X
C273c-60	0.023	-0.01	19.4828	6.12434	0.59	0.140496	0.0538471	X
C273c-61	0.0619	0.094	21.4015	2.61995	0.547	0.0453396	0.360716	X
C273c-62	0.061	0.134	23.1557	4.28746	0.565	0.0454279	0.234944	X
C273c-63	0.044	0.054	18.2258	3.64338	0.606	0.0592528	0.150471	X
C273c-64	0.0464	0.019	18.5246	3.76005	0.57	0.0699354	0.113409	X
C273c-65	0.0998	0.09	27.2289	3.37092	0.487	0.0597986	0.442923	X
C273c-66	0.0728	0.122	26.0369	4.39665	0.536	0.0639055	0.324129	X
C273c-67	0.1102	0.07	35.7595	2.8843	0.44	0.0399805	0.278963	X
C273c-68	0.1085	0.08	35.3125	2.65762	0.463	0.0430087	0.194237	X
C273c-69	0.119	0.136	37.9195	3.5946	0.425	0.0379638	0.296469	X
C273c-70	0.1001	0.079	34.0361	3.2493	0.464	0.0285503	0.242671	X
C273c-72	0.0264	0.038	12.8409	3.2738	0.651	0.0565201	0.212861	X
C273c-73	0.0589	0.029	20.9259	4.01394	0.572	0.0247966	0.12936	X
C273c-74	0.065	0.036	24.3011	5.06051	0.586	0.0503821	0.256563	X
C273c-75	0.0781	0.052	22.9209	2.80217	0.596	0.0572546	0.4266	X
C273c-76	0.1114	0.065	24.9448	2.43602	0.549	0.035729	0.0561552	X
C273c-77	0.1665	0.131	31.6527	1.95787	0.5128	0.011933	0.36399	X
C273c-78	0.1653	0.126	33.8323	2.2074	0.5	0.0269258	0.472196	X
C273c-79	0.0282	0.081	17.6562	3.69348	0.644	0.0751125	0.219375	X
C273c-80	0.0244	0.14	17.9365	4.08554	0.742	0.0608377	0.166159	X
C273c-81	0.0299	0.239	15.0667	6.27295	0.715	0.0980484	0.210432	X
C273c-82	0.0226	0.179	11.5306	4.97521	0.656	0.0889727	0.0618776	X
C273c-84	0.034	0.098	10	3.31229	0.737	0.0464033	0.0992539	X
C273c-86	0.0142	0.09	8.96825	2.74163	0.733	0.0783831	0.0592252	X
C273c-89	0.0557	0.162	29.5812	4.80226	0.387	0.043691	0.117262	X
C273c-90	0.0124	0.041	4.07942	1.16669	0.75	0.0502892	0.0707054	X
C273c-91	0.0634	0.155	23.6402	4.60535	0.55	0.0463249	0.128472	X
C273c-92	0.103	0.017	11.6495	3.05842	0.687	0.0366713	0.556629	X
C273c-93	0.074	0.081	29.199	3.48902	0.54	0.100582	0.22788	X
C273c-94	0.07	0.056	21.3207	4.55166	0.559	0.0310804	0.17386	X
C273c-95	0.0642	0.003	21.3611	2.68477	0.575	0.0474157	0.20156	X
C273c-96	0.149	0.097	27.8325	3.25976	0.53	0.0384884	0.144534	X
C273c-97	0.1038	0.009	27.8325	3.01406	0.589	0.0426587	0.297308	X
C273c-98	0.051	0.023	25.6818	8.27177	0.562	0.0600611	0.210412	X
C273c-99	0.026	0.17	15.4795	5.35738	0.629	0.0711214	0.043228	X
C273c-100	0.066	0.109	28.392	5.46645	0.545	0.0698556	0.0666158	X
C304A-1	0.57	0.19	34.2424	2.13163	0.344	0.01927	0.342248	X
C304A-3	0.47	0.167	36.1022	1.7575	0.352	0.0193277	0.411432	X
C304A-5	0.37	0.155	28.8265	1.89962	0.422	0.0263862	0.25413	X
C304A-6	0.196	0.06	17.2783	1.08318	0.563	0.0256084	0.543196	X
C304A-7	0.0364	0.03	3.89655	0.961119	0.766	0.0419011	0.168912	X
C304A-9	0.398	0.143	20.2873	0.949237	0.536	0.0176329	0.358621	X
C304A-10	0.718	0.28	22.3762	1.25758	0.509	0.0165116	0.493083	X
C304A-11	0.04	0.205	6.34832	2.75278	0.737	0.0361423	0.100582	X
C304A-14	0.054	0.069	12.9885	1.97954	0.61	0.04566	0.158641	X
C304A-17	0.063	0.006	7.84722	1.43628	0.747	0.0362244	0.183976	X
C304A-18	0.255	0.143	13.4364	1.15878	0.606	0.0192846	0.562963	X
C304A-20	0.16	0.044	9.26229	0.808457	0.713	0.0214324	0.136148	X
C304A-21	0.644	0.455	33.9339	1.67072	0.353	0.0156794	0.287942	X
C304A-22	1.151	0.963	44.1751	1.4495	0.2377	0.00829702	0.420719	X
C304A-23	0.028	0.035	12.4176	5.19873	0.582	0.0581764	0.157678	X
C304A-26	0.471	0.31	41.4831	1.84004	0.266	0.017813	0.231291	X
C304A-27	0.191	0.172	27.9012	2.88	0.426	0.0517068	0.304468	X
C304A-29	0.554	0.131	43.6293	2.26864	0.2309	0.0104731	0.437269	X
C304A-30	0.22	0.076	16.967	1.27766	0.562	0.0348617	0.433722	X
C304A-31	0.1073	0.048	12.0085	0.62478	0.654	0.0291047	0.343765	X
C304A-38	0.09	0.065	5.88542	1.02685	0.767	0.0284836	0.11152	X
C304A-39	0.019	0.052	1.17708	0.565123	0.7976	0.0169064	0.0307574	X
C304A-40	0.0919	0.08	5.02222	0.578007	0.728	0.0247385	0.231411	X
C304A-50	3.145	2.379	38.514	1.1976	0.3084	0.00800339	0.570346	X
C304A-53	0.089	0.049	23.8397	3.49401	0.466	0.0295104	0.0794743	X
C304A-58	0.0068	0.021	1.46753	0.535461	0.763	0.0619102	0.053604	X
C304A-61	0.0117	0.137	2.51111	1.11859	0.792	0.0321699	0.0125876	X
C304A-69	0.125	0.084	11.6495	1.71731	0.615	0.025205	0.294041	X
C304A-70	0.457	0.539	28.3279	1.05488	0.44	0.0140869	0.249736	X
C304A-71	0.0013	0.012	1.88333	0.724152	0.8	0.0393954	0.00495042	X
C304A-72	0.039	0.087	5.97884	2.69487	0.731	0.0264149	0.0691753	X
C304A-74	0.017	0.012	6.42045	0.932114	0.742	0.0454887	0.0277349	X
C304A-75	0.0179	0.053	2.45652	0.964068	0.823	0.0497989	0.0765252	X
C304A-76	0.0691	0.15	5.79487	0.791966	0.759	0.0251084	0.280176	X
C304A-79	0.346	0.152	30.4582	1.66817	0.3965	0.012529	0.592335	X
C304A-81	1.313	0.528	39.3591	1.22576	0.2946	0.0104248	0.386936	X
C304A-82	0.024	0.021	5.06726	2.07339	0.759	0.0560931	0.156311	X
C304A-83	0.174	0.142	19.4158	1.33477	0.56	0.0212	0.366075	X
C304A-84	0.058	0.028	10.9709	1.94529	0.66	0.0355421	0.241707	X
C304A-85	0.0065	0.012	2.79703	0.243392	0.81	0.160818	0.0224369	X
C304A-90	0.078	0.091	8.75969	1.58376	0.678	0.0194903	0.138511	X
C304A-92	0.17	0.089	15.6944	4.16827	0.608	0.0446863	0.26096	X
C304A-96	0.0665	0.071	8.30882	1.24705	0.669	0.0292408	0.0642719	X
C304A-97	0.096	0.067	11.1881	1.91283	0.621	0.0361975	0.133926	X
C304A-98	0.065	0.036	8.1295	2.23579	0.744	0.038954	0.14224	X
C304A-99	0.1301	0.258	15.0266	0.917648	0.606	0.0208781	0.334983	X
C304A-100	0.057	-0.004	8.56061	1.70563	0.67	0.0208701	0.189724	X
C304A-2	0.134	0.086	16.3768	1.70979	0.484	0.0204378	0.328758
C304A-4	0.05	0.025	8.96825	2.15218	0.627	0.0381215	0.0562411
C304A-16	0.0012	0.039	1.01802	0.422985	0.849	0.0327463	0.006205
C304A-28	0.088	0.033	21.8992	1.82031	0.46	0.0332962	0.249024
C304A-41	0.281	2.12	12.8848	1.40584	0.557	0.0211684	0.147352
C304A-42	4.69	6.25	50.7409	1.70801	0.1802	0.00407416	0.371575
C304A-43	0.2588	1.53	11.2774	0.519267	0.583	0.0153608	0.397184
C304A-44	0.088	2.55	5.48544	0.608498	0.6385	0.0155654	0.0687597
C304A-45	0.184	0.227	8.1295	0.446751	0.618	0.017227	0.191935
C304A-46	1.055	0.712	22.8052	0.770496	0.473	0.0145083	0.434683
C304A-47	0.275	0.216	10.1527	0.434697	0.5978	0.0147277	0.220351
C304A-48	0.61	0.535	15.7843	0.50687	0.543	0.0154577	0.381358
C304A-49	1.167	1.276	26.2303	0.925467	0.4212	0.0112789	0.379857
C304A-51	0.452	1.284	23.8397	1.66976	0.41	0.0197798	0.382197
C304A-52	0.254	0.798	15.7821	1.03981	0.523	0.017476	0.229754
C304A-86	0.899	0.598	41.8829	1.56407	0.293	0.0115043	0.431958
C283A-29	0.035	0.095	5.70707	2.8299	0.693	0.0312426	0.104585	X
C283A-37	0.0137	0.109	5.65	2.51996	0.601	0.0641364	0.122436	X
C283A-43	0.014	0.248	10.0893	4.15485	0.322	0.0732835	0.0626456	X
C283A-53	0.0161	0.057	8.82812	2.56559	0.52	0.160338	0.202753	X
C283A-58	0.0222	0.178	10.6604	3.43429	0.375	0.071395	0.0682214	X
C283A-63	0.0172	0.164	12.1505	2.63832	0.36	0.130199	0.088283	X
C283A-64	0.015	0.176	12.0213	3.85349	0.404	0.0923541	0.0332534	X
C283A-65	0.0288	0.23	9.1129	2.29457	0.466	0.0984422	0.254378	X
C283A-66	0.0081	0.053	6.64706	2.00406	0.5731	0.0141516	0.108675	X
C283A-67	0.0214	0.075	3.42424	1.45634	0.725	0.0549477	0.340298	X
C283A-85	0.0143	0.087	3.05405	0.912573	0.72	0.260398	0.135556	X
C283A-87	0.0199	0.102	9.33884	3.56134	0.273	0.0443375	0.0334718	X
C283A-88	0.0348	0.08	12.1505	2.76778	0.236	0.0363081	0.0688769	X
C283A-89	0.05	0.143	10	2.32036	0.161	0.0202576	0.0238069	X
C283A-90	0.0485	0.178	11.1881	2.5698	0.148	0.0212076	0.040771	X
C283A-91	0.038	0.136	7.10692	2.02266	0.354	0.0250225	0.112246	X
C283A-92	0.037	0.134	11.6495	4.33762	0.227	0.0303416	0.0767463	X
C283A-96	0.0297	0.056	12.1505	4.32686	0.338	0.0583926	0.0852659	X
C283A-97	0.025	0.073	14.3038	6.5323	0.384	0.0358327	0.023395	X
C283A-98	0.054	0.134	12.9885	3.01118	0.196	0.0253055	0.0589067	X
C283A-99	0.0513	0.175	12.1505	2.3798	0.208	0.0312779	0.030163	X
C283A-11	0.0134	0.2	4.52	1.99342	0.39	0.150203	0.129125
C283A-19	0.0052	0.086	10	3.02377	0.67	0.180498	0.0602003
C283A-20	0.04	0.062	23.5417	7.87894	0.73	0.120885	0.373011
C283A-24	0.005	0.093	16.3768	7.37408	0.76	0.250462	0.0102326
C283A-30	0.0176	0.112	5.59406	1.12037	0.741	0.0299271	0.301749
C283A-42	0.0206	0.164	24.0426	5.16604	0.33	0.130167	0.0215403
C283A-51	0.0134	0.047	3.99293	0.841023	0.767	0.0903123	0.10257
C283A-81	0.0116	0.03	9.33884	3.63829	0.95	0.240751	0.378962
C283C-3	0.016	0.099	7.73973	2.55514	0.417	0.0754623	0.0368514	X
C283C-9	0.019	0.11	8.18841	1.97345	0.29	0.110153	0.0502234	X
C283C-12	0.0154	0.074	6.20879	2.15725	0.535	0.0727907	0.251452	X
C283C-15	0.0305	0.081	11.0784	3.81592	0.309	0.0603174	0.0425006	X
C283C-16	0.0231	0.104	10.8654	3.67112	0.269	0.0662189	0.0230456	X
C283C-21	0.0198	0.073	9.18699	4.34084	0.357	0.0872925	0.145901	X
C283C-25	0.0296	0.039	10.5607	3.7639	0.397	0.0555702	0.211852	X
C283C-26	0.0202	0.07	7.48344	2.29075	0.36	0.0723591	0.148084	X
C283C-28	0.017	0.055	10.5607	4.25585	0.289	0.0543085	0.040521	X
C283C-31	0.027	0.043	9.91228	3.40406	0.362	0.0515113	0.107411	X
C283C-32	0.027	-0.008	9.18699	3.07471	0.261	0.0512664	0.101644	X
C283C-34	0.03	0.03	6.38418	2.13666	0.42	0.0744752	0.159866	X
C283C-35	0.033	0.01	7.63514	3.61847	0.4	0.150213	0.227406	X
C283C-36	0.0295	-0.008	8.1295	1.3671	0.383	0.0368059	0.33526	X
C283C-37	0.0154	0.003	5.38095	2.56744	0.375	0.0232433	0.0411077	X
C283C-38	0.0282	0.031	6.80723	1.73438	0.397	0.0516144	0.215926	X
C283C-40	0.0287	-0.002	8.1295	2.64313	0.304	0.0842198	0.624996	X
C283C-46	0.03	-0.014	4.97797	1.86997	0.571	0.0996565	0.0915484	X
C283C-77	0.036	0	9.65812	2.65738	0.396	0.030062	0.091332	X
C283C-78	0.023	-0.013	9.74138	4.12526	0.233	0.0462354	0.470995	X
C283C-83	0.0165	0.025	12.8409	4.24916	0.288	0.0612713	0.20311	X
C283C-87	0.0286	0.005	9.57627	2.53215	0.304	0.0374962	0.0281688	X
C283C-88	0.029	-0.004	5.67839	1.77733	0.412	0.0556138	0.173985	X
C283C-89	0.04	0.025	6.01064	2.0541	0.604	0.0242266	0.303047	X
C283C-92	0.0197	0.052	8.89764	4.21207	0.504	0.0647889	0.0740586	X
C283C-4	0.024	0.105	12.8409	2.22243	0.324	0.05141	0.113071
C283C-6	0.01	0.033	2.26	0.996709	0.36	0.100259	0.0585221
C283C-18	0.0119	0.064	4.70833	1.96688	0.348	0.0773139	0.0378381
C283C-20	0.0289	0.049	19.1525	5.22559	0.44	0.0675754	0.158454
C283C-27	0.044	0.056	17.1212	6.24705	0.41	0.020694	0.429937
C283C-39	0.0895	0.014	10.9709	1.217	0.545	0.0580328	0.493388
C283C-42	0.016	0.076	18.2258	5.31954	0.8	0.130981	0.0638169
C283C-59	0.0131	0.03	20.5455	9.73193	0.86	0.3704	0.0965649
C283C-66	0.0116	-0.002	0.502222	0.145867	0.769	0.052312	0.141859
C283C-71	0.007	0.069	5.38095	2.36289	0.818	0.0202891	0.0247286
C283C-76	0.0105	0.079	21.7726	3.83169	0.19	0.170042	0.0194402
C283C-84	0.011	-0.003	11.1881	1.15747	0.44	0.120322	0.104866
C283C-90	0.03	0.013	13.9506	3.46993	0.54	0.0580141	0.210723
C254A-7	0.061	0.009	10.0893	3.52625	0.801	0.036683	0.277427
C254A-9	0.077	0.026	7.9021	1.02253	0.794	0.0225427	0.222868
C254A-10	0.06	0.023	2.09259	0.430867	0.715	0.021459	0.29562
C254A-13	1.3	0.217	8.01418	0.940656	0.212	0.0362488	0.437733
C254A-14	1.28	0.186	9.33884	1.04173	0.176	0.0292128	0.605054
C254A-15	9.4	0.539	11.5306	1.91407	0.148	0.0152893	0.564086
C254A-16	1.56	0.167	11.5306	1.22639	0.105	0.0121824	0.470327
C254A-17	0.919	0.265	11.6615	0.595081	0.0662	0.00282895	0.546432
C254A-18	0.928	1.278	0.70625	0.0695183	0.7946	0.0183629	0.522692
C254A-19	2.66	1.83	0.248352	0.0251456	0.8443	0.0171682	0.451541
C254A-22	0.009	0.014	1.36145	0.542836	0.84	0.0652015	0.0824708
C254A-26	0.0342	-0.017	2.825	0.564338	0.805	0.0272619	0.0982864
C254A-27	1.57	0.933	0.484978	0.0927324	0.8136	0.0179173	0.551563
C254A-28	4.1	0.39	9.26229	1.46901	0.155	0.0202388	0.48021
C254A-29	0.0285	0.003	1.44872	0.540377	0.803	0.0305602	0.352502
C254A-34	0.038	-0.013	8.96825	1.79964	0.785	0.0505024	0.329899
C254A-37	0.048	-0.001	6.89024	2.02722	0.814	0.0306763	0.373472
C254A-41	0.036	0.006	3.64516	1.29806	0.802	0.0340188	0.354454
C254A-42	0.39	0.131	19.2833	3.21157	0.534	0.0271857	0.33681
C254A-43	0.068	0.066	3.72937	0.661857	0.706	0.0185304	0.346376
C254A-44	0.028	0.023	2.26	0.636422	0.797	0.0233042	0.129049
C254A-45	0.014	0.053	2.05455	0.56371	0.81	0.0323487	0.210093
C254A-48	0.023	0.06	1.76562	0.719238	0.798	0.0271794	0.186623
C254A-51	0.055	0.034	4.15441	0.894592	0.748	0.0219044	0.265032
C254A-53	0.091	0.03	3.01333	0.326165	0.733	0.017361	0.499228
C254A-54	0.147	-0.021	10.5607	1.41764	0.77	0.0276796	0.19964
C254A-55	0.126	0.047	7.29032	2.12782	0.734	0.0316149	0.170043
C254A-56	0.0315	0.021	3.97887	1.39213	0.777	0.037383	0.296637
C254A-58	0.0185	0.011	2.21569	0.741547	0.811	0.0306445	0.206948
C254A-59	0.0275	0.023	2.45652	0.698135	0.745	0.0211426	0.125799
C254A-61	0.95	0.39	27.561	5.90646	0.498	0.050002	0.403288
C254A-62	0.242	0.139	11.4141	1.42528	0.59	0.021523	0.545458
C254A-63	0.047	0.099	3.42424	1.14603	0.706	0.0313588	0.290431
C254A-64	0.642	0.455	25.4504	2.30813	0.513	0.016561	0.395598
C254A-65	0.0183	0.051	1.44872	0.632986	0.781	0.0223603	0.211349
C254A-66	0.055	0.056	2.43534	0.333513	0.736	0.0203145	0.396368
C254A-68	0.049	0.08	2.51111	0.729333	0.739	0.0217818	0.242609
C254A-69	0.036	0.035	3.39339	0.660081	0.744	0.0308288	0.130602
C254A-71	0.0172	-0.002	1.50667	0.604359	0.826	0.0259405	0.126907
C254A-72	0.064	0.082	3.50932	0.802526	0.794	0.0271325	0.21052
C254A-73	0.34	0.217	8.89764	1.91036	0.718	0.0230263	0.322138
C254A-74	0.015	0.05	1.31702	0.0500355	0.7902	0.0158952	0.0631989
C254A-76	0.071	0.068	5.79487	1.40749	0.748	0.0226451	0.179396
C254A-77	0.084	0.038	4.70833	0.797333	0.789	0.0246983	0.177379
C254A-78	0.01	0.076	0.965812	0.463176	0.814	0.0214718	0.156168
C254A-79	0.061	0.097	1.39506	0.227777	0.762	0.0187951	0.427537
C254A-80	0.0501	0.121	2.86802	0.331642	0.777	0.026935	0.191271
C254A-81	0.0576	0.123	2.57403	0.521725	0.755	0.018111	0.416379
C254A-82	0.018	0.05	0.724359	0.26556	0.809	0.0332083	0.290892
C254A-83	0.147	0.073	11.0784	1.66274	0.671	0.0328648	0.593993
C254A-85	0.038	0.023	2.35417	0.983442	0.778	0.0196498	0.417883
C254A-86	0.066	0.068	5.67839	1.3236	0.743	0.0218362	0.332661
C254A-87	0.032	0.037	3.53125	1.43848	0.78	0.0383192	0.135733
C254A-88	0.019	0.001	4.78814	0.804192	0.79	0.0458109	0.088262
C254A-90	0.038	0.044	5.13636	2.33979	0.814	0.03951	0.197924
C254A-91	0.039	0.006	3.42424	1.24941	0.755	0.0436922	0.176168
C254A-93	0.064	0.037	2.825	0.851727	0.787	0.0204144	0.165362
C254A-94	0.084	0.075	2.52796	0.54819	0.741	0.0225529	0.481499
C254A-95	0.12	0.061	6.49425	0.807641	0.738	0.0217683	0.28786
C254A-97	0.0228	0.032	2.30612	0.849967	0.774	0.0237409	0.236915
C254A-98	0.02	0.062	1.73846	0.590709	0.787	0.0374666	0.0473054
C254A-99	0.055	0.032	1.10784	0.262779	0.7896	0.0168934	0.313416
C254A-100	0.026	0.085	1.22826	0.508662	0.778	0.0337952	0.0765246
Experiment F (P3D; 65 µm; 238 on Faraday)
C258-1	0.00345	0.051	3.20165	0.343223	0.698	0.0471156	0.402559	X
C258-2	0.0039	0.035	1.46602	0.392696	0.724	0.0472723	0.710276	X
C258-3	0.00363	0.02	1.76853	0.375495	0.753	0.0942115	0.630688	X
C258-5	0.00326	-0.011	3.01944	0.397972	0.67	0.14064	0.406987	X
C258-7	0.00338	0.013	4.17293	0.513197	0.57	0.12054	0.55635	X
C258-8	0.0039	0.028	4.18862	0.619126	0.64	0.130629	0.550161	X
C258-9	0.00318	-0.01	2.18465	0.609576	0.692	0.0762663	0.629348	X
C258-10	0.0102	-0.005	5.62714	2.12181	0.648	0.0770971	0.209185	X
C258-11	0.021	-0.001	10.7132	0.940118	0.268	0.0363968	0.524763	X
C258-13	0.02204	0.019	8.52466	0.587538	0.42	0.0428318	0.435621	X
C258-15	0.0123	0.027	5.15821	0.739003	0.554	0.0424708	0.565878	X
C258-16	0.123	0.075	0.612183	0.1249	0.7929	0.0185894	0.642754	X
C258-17	0.01434	0.01	7.09665	0.805581	0.432	0.0360507	0.623505	X
C258-18	0.01128	0.028	6.33053	0.720672	0.538	0.0797294	0.622121	X
C258-19	0.01174	-0.03	7.57941	0.770003	0.424	0.0983662	0.367081	X
C258-20	0.00706	-0.066	4.00782	0.399839	0.672	0.0693155	0.586673	X
C258-21	0.00383	0.003	4.99629	0.823002	0.43	0.150246	0.44291	X
C258-22	0.00599	0.016	6.47775	1.13919	0.53	0.160351	0.579449	X
C258-23	0.00601	0.003	6.87761	1.23746	0.61	0.110674	0.59308	X
C258-24	0.004346	0.028	5.74316	0.579428	0.62	0.180427	0.375695	X
C258-25	0.0065	0.012	0.968846	0.183432	0.801	0.035786	0.467714	X
C258-26	0.00399	-0.01	0.663198	0.126789	0.785	0.0401932	0.652718	X
C258-28	0.00295	-0.002	0.944215	0.159196	0.779	0.0286136	0.645239	X
C258-29	0.00551	0.019	2.2418	0.429852	0.739	0.0511805	0.653196	X
C258-32	0.00388	0	0.51822	0.125628	0.823	0.0251382	0.686884	X
C258-33	0.004204	0.006	0.850514	0.130481	0.794	0.0357236	0.676259	X
C258-34	0.00176	0.048	1.48359	0.176372	0.806	0.072807	0.728811	X
C258-35	0.00152	-0.01	0.718821	0.134734	0.839	0.056547	0.526819	X
C258-36	0.00357	0.008	0.920804	0.0955352	0.779	0.0392267	0.534431	X
C258-37	0.00203	0.029	0.309493	0.0958249	0.841	0.037933	0.665971	X
C258-39	0.00295	0.031	0.278543	0.0500264	0.823	0.026682	0.684787	X
C258-41	0.0148	-0.03	2.47594	0.617761	0.706	0.042419	0.64025	X
C258-42	0.00875	-0.009	7.90194	0.878454	0.48	0.120383	0.23798	X
C258-43	0.01813	-0.029	3.84198	0.349072	0.619	0.0409178	0.51181	X
C258-45	0.02404	-0.008	2.52647	0.503079	0.712	0.0500677	0.589785	X
C258-46	0.006824	0.01	4.03686	0.618891	0.591	0.0631167	0.618873	X
C258-47	0.0239	-0.033	4.17293	0.362923	0.567	0.0386988	0.472773	X
C258-48	0.01523	0.011	8.13265	0.872289	0.369	0.0525211	0.476404	X
C258-50	0.01329	0.023	1.73547	0.243086	0.748	0.0317459	0.592499	X
C258-51	0.0913	-0.006	11.9163	0.70794	0.176	0.0351766	0.157725	X
C258-52	0.01924	0.034	8.18643	0.688313	0.422	0.0360032	0.502542	X
C258-53	0.086	0.026	4.26886	1.48742	0.52	0.110491	0.602842	X
C258-54	0.1185	0.026	10.5509	0.579485	0.246	0.0176976	0.259866	X
C258-56	0.0808	0.058	3.48179	0.962487	0.605	0.0710381	0.614394	X
C258-57	0.0292	-0.012	11.5578	0.714176	0.152	0.0251842	0.171093	X
C258-59	0.0317	0.032	1.46602	0.545063	0.736	0.071531	0.65678	X
C258-60	0.0286	0.03	6.92033	1.58562	0.493	0.0776287	0.455089	X
C258-61	0.0797	0.03	12.4211	0.76293	0.163	0.0134025	0.485482	X
C258-62	0.0786	0.02	9.05832	1.9676	0.347	0.0733291	0.350299	X
C258-63	0.0447	0.01	9.20804	1.09118	0.259	0.0572349	0.119579	X
C258-66	0.0743	-0.001	12.3522	0.749443	0.136	0.0172162	0.343663	X
C258-67	0.1151	0.012	0.428528	0.166205	0.801	0.0226416	0.682009	X
C258-69	0.0244	0.011	3.68932	0.684985	0.611	0.0296366	0.542333	X
C258-70	0.0327	-0.019	4.72107	0.589452	0.521	0.029876	0.396372	X
C258-72	0.0128	0.003	0.870448	0.208602	0.773	0.0237279	0.665095	X
C258-73	0.095	0.08	0.546163	0.189388	0.812	0.0249948	0.669146	X
C258-74	0.01175	-0.008	10.2218	1.49664	0.267	0.09515	0.331545	X
C258-75	0.0212	-0.016	11.7529	0.801803	0.188	0.042168	0.239999	X
C258-77	0.001492	0.019	0.2879	0.0412757	0.804	0.0477867	0.632895	X
C258-78	0.00278	0.009	5.28044	1.10802	0.55	0.150403	0.629151	X
C258-79	0.002485	0.033	3.54832	0.592219	0.64	0.110742	0.495882	X
C258-80	0.0192	-0.011	0.920804	0.353073	0.778	0.0337952	0.691962	X
C258-83	0.01283	-0.001	5.51571	0.710997	0.605	0.0495016	0.5686	X
C258-84	0.0151	-0.005	8.84264	0.889623	0.443	0.0765147	0.172611	X
C258-85	0.0257	0.028	3.73884	0.714928	0.656	0.043048	0.614832	X
C258-86	0.0159	0.008	1.82651	0.694714	0.693	0.0664613	0.632203	X
C258-87	0.01494	0.025	5.25553	1.14609	0.607	0.0631774	0.57353	X
C258-88	0.00664	-0.021	4.95188	0.684585	0.6	0.110653	0.598829	X
C258-89	0.01173	0.023	6.75256	0.961566	0.497	0.0608178	0.584004	X
C258-90	0.01586	-0.012	3.62923	0.962979	0.635	0.0515877	0.598102	X
C258-92	0.02327	0.013	2.51506	0.427675	0.672	0.0469642	0.663001	X
C258-94	0.0194	0.031	7.63132	0.647148	0.429	0.0517167	0.258757	X
C258-95	0.00323	0.013	3.75142	0.622587	0.64	0.150545	0.598795	X
C258-98	0.0475	0.004	5.23086	1.15955	0.497	0.0796229	0.508551	X
C258-99	0.0311	0.001	8.637	1.21738	0.352	0.0495031	0.396441	X
C258-100	0.0108	-0.002	8.07372	0.809848	0.288	0.0473516	0.275299	X
C258-4	0.0073	0.016	1.23797	0.241893	0.83	0.0316948	0.596484
C258-6	0.0097	0.016	4.00782	0.944173	0.74	0.0579227	0.184761
C258-14	0.0553	0.033	29.3203	2.30187	0.321	0.0414996	0.307361
C258-30	0.0168	0.013	1.37552	0.463637	0.797	0.0248009	0.679063
C258-31	0.0824	0.027	5.38248	1.04919	0.819	0.0266328	0.679246
C258-38	0.0158	-0.014	0.994797	0.35875	0.833	0.0217613	0.489483
C258-40	0.0218	0.017	3.20165	0.610182	0.823	0.0488562	0.329731
C258-44	0.0273	-0.019	13.6207	0.834858	0.503	0.0490429	0.371208
C258-49	0.02215	-0.002	3.35594	0.262729	0.718	0.0262718	0.595457
C258-55	0.1912	-0.014	16.8304	1.24332	0.195	0.049155	0.220809
C258-58	0.1236	0.039	17.4909	0.966682	0.174	0.0124944	0.191235
C258-64	0.0395	0.003	7.90194	1.40184	0.636	0.0438839	0.555971
C258-65	0.01979	0.002	2.82785	0.661249	0.792	0.0366047	0.676914
C258-68	0.0474	-0.005	15.5611	2.08489	0.42	0.0635575	0.45263
C258-76	0.02885	0.007	33.7628	6.66303	0.631	0.0898903	0.72792
C258-81	0.0996	-0.025	17.7416	2.06483	0.515	0.0288979	0.650679
C258-82	0.0377	-0.011	6.96358	1.01883	0.656	0.043048	0.23105
C258-91	0.0239	0.059	1.76853	0.212926	0.811	0.0234966	0.409331
C258-93	0.0289	0.023	6.6717	1.2826	0.674	0.0634485	0.591043
C258-96	0.00295	0.026	0.891339	0.253523	0.842	0.0261455	0.696301
C273c-1	0.10168	0.086	52.8044	4.79623	0.345	0.0633767	0.251164	X
C273c-2	0.1293	0.043	55.7087	3.9392	0.218	0.0661439	0.14548	X
C273c-3	0.1897	0.05	62.6644	4.31066	0.205	0.0451864	0.259894	X
C273c-4	0.1886	0.07	56.8456	4.49348	0.268	0.0324458	0.347992	X
C273c-5	0.2002	0.013	64.4403	3.5502	0.193	0.0243084	0.16946	X
C273c-6	0.3841	0.016	67.9374	4.38658	0.151	0.0291568	0.161683	X
C273c-7	0.238	0.029	60.6518	3.95725	0.217	0.0243893	0.346435	X
C273c-8	0.03321	-0.003	32.4832	4.20883	0.61	0.150495	0.489368	X
C273c-9	0.00881	0.014	11.1417	1.65634	0.89	0.170929	0.362984	X
C273c-10	0.00373	0.037	4.35224	0.762742	0.7	0.180544	0.640777	X
C273c-11	0.04348	-0.006	32.2949	6.47629	0.591	0.0897815	0.688937	X
C273c-12	0.3678	0.002	61.3532	4.41543	0.22	0.0422298	0.203598	X
C273c-13	0.579	0.026	69.8541	3.86894	0.124	0.014218	0.170019	X
C273c-14	0.766	-0.001	70.8762	3.84347	0.12	0.010284	0.2159	X
C273c-15	0.488	0.052	67.896	3.77673	0.146	0.0182353	0.202791	X
C273c-16	0.6054	-0.008	68.3123	4.96395	0.156	0.0271797	0.209027	X
C273c-17	0.323	-0.008	52.3086	4.72014	0.301	0.0394619	0.337793	X
C273c-18	0.05888	0.004	31.9247	4.32987	0.567	0.0738755	0.529082	X
C273c-19	0.3667	-0.022	62.9476	5.59291	0.217	0.0412291	0.261761	X
C273c-20	0.4409	-0.009	53.0559	4.62592	0.339	0.0415568	0.399714	X
C273c-21	0.442	0.031	65.7717	3.70585	0.16	0.0163169	0.522662	X
C273c-22	0.738	0.021	72.9171	4.09341	0.0968	0.00901044	0.135556	X
C273c-23	1.067	0.034	72.3489	3.8181	0.092	0.0131296	0.114411	X
C273c-24	1.094	0.003	72.8694	4.00715	0.1038	0.00972419	0.273514	X
C273c-25	0.874	-0.002	71.7433	3.91597	0.0893	0.00780704	0.30218	X
C273c-26	0.2717	0.034	53.8248	4.32079	0.229	0.0234516	0.389115	X
C273c-27	0.2032	0.006	53.8248	3.27838	0.244	0.0157739	0.506	X
C273c-28	0.0939	0.051	49.0609	3.19834	0.334	0.0425279	0.2378	X
C273c-29	0.0299	0.025	29.3203	3.84015	0.481	0.0845491	0.676088	X
C273c-30	0.01448	0.007	7.84629	2.84521	0.7	0.0713863	0.692358	X
C273c-31	0.00413	-0.008	7.63132	0.919242	0.76	0.120959	0.638734	X
C273c-32	0.001494	0.01	2.98706	0.48028	0.68	0.150615	0.518026	X
C273c-33	0.00435	0.001	8.37724	1.99701	0.89	0.230688	0.701841	X
C273c-34	0.00687	0.025	12.3797	2.41893	0.74	0.220497	0.582758	X
C273c-37	0.00282	-0.022	3.31599	0.374274	0.98	0.12159	0.752701	X
C273c-38	0.06167	0.025	44.5669	3.48079	0.286	0.0384281	0.499433	X
C273c-39	0.1685	0.039	62.9476	5.02093	0.266	0.049288	0.194299	X
C273c-40	0.117	0.012	58.0299	5.13059	0.225	0.0342965	0.384659	X
C273c-41	0.0162	0.02	12.3797	1.63479	0.692	0.0940242	0.63303	X
C273c-42	0.01275	0.024	12.9555	2.93465	0.775	0.0707195	0.619994	X
C273c-43	0.01217	0.035	14.1035	3.4645	0.61	0.120619	0.805709	X
C273c-44	0.01271	0.019	3.82877	1.29054	0.82	0.0395596	0.714484	X
C273c-45	0.01196	-0.003	5.68456	1.70601	0.779	0.0707371	0.701493	X
C273c-46	0.01201	0.013	16.1944	2.26792	0.78	0.0982464	0.436279	X
C273c-47	0.01714	0.011	15.4746	2.48757	0.62	0.140548	0.40468	X
C273c-48	0.05827	0.068	39.7919	7.37898	0.449	0.0616574	0.582771	X
C273c-49	0.045	0.046	35.0369	5.36245	0.466	0.0805411	0.442455	X
C273c-50	0.0411	0.049	41.8862	4.32071	0.481	0.0855426	0.363703	X
C273c-51	0.01245	-0.038	17.1675	2.53073	0.52	0.12045	0.405773	X
C273c-52	0.01055	-0.002	11.8529	4.45293	0.85	0.200721	0.678635	X
C273c-53	0.01143	0.007	16.6294	3.81473	0.68	0.180513	0.625969	X
C273c-54	0.01133	-0.002	12.1106	1.81525	0.683	0.096967	0.757414	X
C273c-55	0.0153	0.026	26.1543	3.33669	0.73	0.110965	0.473818	X
C273c-56	0.018	0.02	26.7188	6.16932	0.54	0.150388	0.474215	X
C273c-57	0.01479	-0.01	21.2628	3.92064	0.72	0.210493	0.483544	X
C273c-58	0.01763	0.014	13.264	2.308	0.73	0.130817	0.725545	X
C273c-59	0.0277	-0.001	30.1944	4.28436	0.508	0.0856051	0.518881	X
C273c-60	0.01634	0.011	23.1156	4.65383	0.58	0.150448	0.623602	X
C273c-61	0.071	0.184	28.2069	2.38883	0.542	0.0492088	0.679716	X
C273c-62	0.07314	0.182	30.6092	2.53286	0.582	0.0640663	0.65154	X
C273c-63	0.0405	0.129	21.9325	1.6644	0.68	0.0703275	0.306872	X
C273c-64	0.0476	0.114	20.0752	1.79079	0.621	0.0476472	0.837809	X
C273c-65	0.05556	0.14	26.5279	2.41754	0.555	0.0541499	0.614357	X
C273c-66	0.0735	0.17	31.0355	2.32324	0.545	0.066894	0.648051	X
C273c-67	0.1059	0.102	37.8971	2.44604	0.385	0.035837	0.44038	X
C273c-68	0.0941	0.111	37.641	2.59068	0.433	0.0399499	0.307532	X
C273c-69	0.0932	0.137	37.5142	3.04595	0.396	0.0496359	0.558613	X
C273c-70	0.1138	0.139	36.4109	2.46768	0.394	0.0388084	0.593132	X
C273c-71	0.03963	0.05	20.8257	1.37326	0.662	0.0673149	0.494245	X
C273c-72	0.0586	0.012	25.9714	1.73475	0.536	0.0337479	0.391027	X
C273c-73	0.05213	0.052	24.4336	1.69768	0.547	0.0405054	0.520047	X
C273c-74	0.0794	0.101	26.9841	1.49631	0.543	0.0511658	0.222047	X
C273c-75	0.0916	0.129	26.5912	1.59911	0.554	0.0444046	0.359399	X
C273c-76	0.0716	0.211	23.5555	1.34398	0.552	0.0492532	0.295003	X
C273c-77	0.1566	0.141	31.0355	1.96795	0.464	0.0333184	0.503469	X
C273c-78	0.1586	0.216	43.353	2.8534	0.383	0.0271049	0.510259	X
C273c-79	0.0348	0.188	28.4228	2.84553	0.497	0.0549072	0.634168	X
C273c-80	0.026	0.039	22.8314	1.53708	0.58	0.120559	0.312444	X
C273c-81	0.01488	0.139	13.9272	1.82661	0.782	0.0824961	0.466671	X
C273c-82	0.03134	0.169	23.0201	3.47778	0.62	0.120639	0.792006	X
C273c-83	0.0995	0.065	50.188	3.37756	0.3	0.0573149	0.196162	X
C273c-84	0.02739	0.046	11.0533	0.770808	0.693	0.0480427	0.69424	X
C273c-85	0.01671	0.08	6.39962	0.369008	0.785	0.0392745	0.515623	X
C273c-86	0.01478	0.064	8.19245	0.779014	0.706	0.0577527	0.67689	X
C273c-87	0.01668	0.197	9.05096	0.759748	0.74	0.067639	0.59562	X
C273c-88	0.01533	0.047	6.71189	0.43129	0.714	0.0645981	0.283861	X
C273c-89	0.0882	0.141	43.8651	2.90157	0.351	0.0298376	0.320911	X
C273c-90	0.0125	0.073	4.90825	0.327077	0.771	0.0364249	0.603292	X
C273c-91	0.06983	0.169	33.4587	2.39088	0.514	0.0412999	0.531002	X
C273c-92	0.0986	0.225	40.5154	3.57576	0.46	0.0537926	0.348984	X
C273c-93	0.08	0.16	34.9271	2.71613	0.508	0.0393348	0.615832	X
C273c-94	0.0367	0.053	22.1947	1.56628	0.647	0.0458633	0.427735	X
C273c-95	0.0779	0.13	33.2589	2.51468	0.503	0.0364171	0.492116	X
C273c-96	0.279	0	43.353	3.33186	0.389	0.0205312	0.355497	X
C273c-97	0.0982	0.02	14.321	1.85561	0.687	0.0267916	0.610209	X
C273c-98	0.163	0.088	31.297	2.84306	0.495	0.0223161	0.696432	X
C273c-99	0.1567	0.041	32.8084	1.89888	0.448	0.0332307	0.57922	X
C273c-100	0.0588	0.199	42.8528	3.79441	0.472	0.0617261	0.502365	X
C304A-1	0.0247	0.053	1.73277	0.26772	0.829	0.0325407	0.218916	X
C304A-2	0.2117	0.018	12.366	0.782971	0.67	0.0161978	0.382856	X
C304A-3	0.185	0.065	7.76969	0.63626	0.727	0.023139	0.210411	X
C304A-4	0.00492	0.07	0.104128	0.0173437	0.8461	0.0177326	0.161317	X
C304A-5	0.00132	0.091	0.0340726	0.0030259	0.846	0.023287	0.160912	X
C304A-6	0.325	0.054	17.0103	1.24481	0.5874	0.0147386	0.171149	X
C304A-7	0.557	0.24	23.5058	1.31736	0.487	0.0146924	0.457591	X
C304A-8	0.089	0.071	4.45669	0.9881	0.762	0.0327606	0.203755	X
C304A-9	0.0496	0.113	1.14863	0.142356	0.821	0.0209432	0.136455	X
C304A-10	0.00748	0.242	0.122302	0.013782	0.8353	0.0185227	0.231355	X
C304A-11	0.1327	0.146	4.3185	0.412529	0.773	0.0184123	0.479896	X
C304A-12	0.0533	0.043	2.99509	0.270644	0.763	0.0243694	0.0981157	X
C304A-13	0.01345	0.006	0.675256	0.111632	0.824	0.0216238	0.623188	X
C304A-14	0.103	0.082	3.81566	0.718366	0.7903	0.0177152	0.11233	X
C304A-15	0.897	0.425	18.2951	1.09443	0.566	0.0164967	0.5375	X
C304A-16	0.0382	-0.008	2.1182	0.260129	0.784	0.0197449	0.482796	X
C304A-17	0.549	0.581	29.4833	1.66065	0.4114	0.0101247	0.434888	X
C304A-18	0.288	0.225	17.2473	1.05865	0.573	0.0221885	0.0989654	X
C304A-22	0.419	0.282	28.9396	3.2692	0.389	0.0205312	0.530643	X
C304A-23	0.35	0.221	28.6862	1.56274	0.398	0.0169812	0.349692	X
C304A-24	0.246	0.13	26.8864	1.39255	0.421	0.016337	0.424244	X
C304A-25	0.3453	0.128	31.0355	1.81997	0.398	0.013578	0.405476	X
C304A-26	1.08	0.471	37.0034	2.04039	0.325	0.0172699	0.341459	X
C304A-27	0.694	0.63	22.1506	1.26756	0.5137	0.0126616	0.500711	X
C304A-28	0.625	0.405	23.6555	2.41838	0.492	0.0325242	0.490883	X
C304A-31	0.00084	0.009	0.222835	0.0306217	0.799	0.0669355	0.211731	X
C304A-32	0.0106	0.003	1.79705	0.303455	0.849	0.048097	0.215038	X
C304A-33	0.000478	0.032	0.0714214	0.00580631	0.813	0.0250078	0.242382	X
C304A-34	0.000458	0.029	0.0520642	0.00617158	0.837	0.0317683	0.3008	X
C304A-35	0.524	0.4	14.395	1.06217	0.612	0.0178555	0.351564	X
C304A-36	0.002	-0.016	0.397919	0.157586	0.852	0.0310864	0.0567048	X
C304A-37	0.2085	0.169	16.2891	1.14845	0.613	0.0226121	0.55236	X
C304A-39	0.1	0.035	28.3505	3.47624	0.424	0.0245135	0.282125	X
C304A-40	0.168	0.086	13.4238	1.03852	0.648	0.0190778	0.31753	X
C304A-41	0.3399	1.517	24.6498	1.47926	0.431	0.0139751	0.411345	X
C304A-42	2.8	1.216	47.2307	2.68678	0.1993	0.00875946	0.52257	X
C304A-43	1.095	3.969	29.1363	1.53386	0.3828	0.00919915	0.483315	X
C304A-46	0.03602	1.008	6.42175	0.394662	0.705	0.0386628	0.391038	X
C304A-50	1.063	1.196	22.4768	1.18375	0.4831	0.0128687	0.424337	X
C304A-51	0.00035	0.04	0.218465	0.0948709	0.8	0.0963379	0.214338	X
C304A-52	0.000611	0.059	0.757941	0.119596	0.78	0.160759	0.272725	X
C304A-53	0.000534	0.032	0.602256	0.121003	0.89	0.131213	0.438929	X
C304A-54	0.000164	0.072	0.108172	0.0298993	0.726	0.0872171	0.288154	X
C304A-55	0.00118	0.071	1.12543	0.278573	0.783	0.0883982	0.320861	X
C304A-56	0.001319	0.07	0.0486539	0.00352394	0.842	0.023229	0.396291	X
C304A-57	0.000732	0.036	0.0679374	0.0063671	0.827	0.0333852	0.16235	X
C304A-58	0.00395	-0.014	0.58951	0.0892249	0.81	0.0478272	0.313059	X
C304A-60	0.0018	-0.008	0.640329	0.118489	0.813	0.0478475	0.13391	X
C304A-61	0.072	0.144	4.15736	1.39618	0.735	0.0379617	0.0953114	X
C304A-62	0.0315	0.174	3.75142	0.622587	0.755	0.0192876	0.0989281	X
C304A-63	0.00108	0.088	0.163849	0.0323777	0.835	0.03878	0.0931388	X
C304A-64	0.308	0.257	29.0149	1.75201	0.433	0.0164619	0.428825	X
C304A-65	0.069	0.139	11.9804	2.3949	0.619	0.0505397	0.283814	X
C304A-66	0.0596	0.074	9.28478	0.562274	0.687	0.0376004	0.441911	X
C304A-67	0.00792	0.024	1.82651	0.201537	0.818	0.051659	0.4556	X
C304A-68	0.056	0.039	13.4238	2.67334	0.604	0.0446646	0.246455	X
C304A-69	0.231	0.079	20.0031	1.49656	0.539	0.031878	0.449522	X
C304A-70	0.62	0.278	34.4945	2.7453	0.36	0.0289109	0.52232	X
C304A-71	0.0126	0.014	1.44698	0.219007	0.8	0.033121	0.085677	X
C304A-72	0.00909	0.032	1.42477	0.133549	0.814	0.0315284	0.260004	X
C304A-73	0.0214	0.032	3.70157	0.279213	0.79	0.0514844	0.26362	X
C304A-74	0.069	0.053	7.5282	2.2194	0.728	0.0444521	0.101991	X
C304A-76	0.0095	0.108	1.35875	0.19452	0.804	0.0431111	0.215196	X
C304A-77	0.00137	0.108	0.159168	0.0262476	0.837	0.030087	0.213134	X
C304A-78	0.0044	0.052	0.50188	0.149074	0.803	0.0394198	0.0306924	X
C304A-80	0.0772	0.081	8.70448	0.807385	0.677	0.0431779	0.121114	X
C304A-81	0.0192	0.031	2.89396	0.445115	0.784	0.0457697	0.398608	X
C304A-82	0.047	0.066	6.22443	0.520559	0.74	0.0483223	0.381176	X
C304A-83	0.029	0.038	2.37058	0.865598	0.79	0.0505336	0.100862	X
C304A-84	0.0022	0.055	0.31563	0.0828827	0.833	0.0268059	0.194999	X
C304A-85	0.165	0.13	16.1944	1.39003	0.625	0.0244387	0.230178	X
C304A-86	0.063	0.065	5.62714	0.790671	0.761	0.0309943	0.168525	X
C304A-87	0.00105	0.032	0.13264	0.0338166	0.853	0.0537777	0.110417	X
C304A-89	0.0348	0.058	3.54832	0.261498	0.77	0.0293626	0.230828	X
C304A-90	0.0097	0.058	0.877302	0.211828	0.823	0.0316217	0.0783813	X
C304A-91	0.573	0.194	28.4228	1.78956	0.405	0.0144779	0.385938	X
C304A-92	0.0199	0.049	2.42212	0.643358	0.813	0.0323788	0.0819143	X
C304A-93	0.031	0.028	5.43499	0.71635	0.783	0.0383437	0.511742	X
C304A-94	0.00138	0.013	0.188843	0.0364521	0.848	0.039795	0.0805964	X
C304A-95	0.000393	0.006	0.0640329	0.00974131	0.833	0.0378623	0.201214	X
C304A-97	0.0419	0.072	6.3126	0.469019	0.715	0.0254065	0.39433	X
C304A-98	0.0158	0.016	3.30615	0.389952	0.752	0.0335589	0.390063	X
C304A-99	0.0336	0.061	4.35224	0.361781	0.774	0.0364504	0.229556	X
C304A-100	0.083	0.064	10.4128	1.92091	0.674	0.033804	0.242883	X
C304A-19	0.0578	0.746	3.27698	0.200557	0.6736	0.0164273	0.355501
C304A-20	0.224	0.148	8.637	2.0545	0.637	0.0372466	0.441849
C304A-21	0.0535	0.038	14.9956	1.81689	0.575	0.0464462	0.590459
C304A-29	0.0203	-0.004	9.68846	1.51191	0.627	0.0642359	0.524182
C304A-38	0.0389	0.037	10.5111	1.30083	0.65	0.0392173	0.334013
C304A-44	0.071	0.882	5.20156	0.314746	0.667	0.0301157	0.383358
C304A-45	0.0418	0.292	2.23281	0.128015	0.697	0.0295012	0.361515
C304A-47	0.1496	2.271	9.58841	0.53219	0.606	0.0251176	0.449316
C304A-48	0.304	0.447	7.79142	2.80593	0.603	0.0379663	0.127324
C304A-49	0.409	0.361	13.4562	0.803249	0.571	0.0165655	0.334201
C304A-75	0.0403	0.071	4.36931	0.850978	0.71	0.0359255	0.251211
C304A-88	0.289	0.25	18.7256	1.44566	0.507	0.0345227	0.447897
C304A-96	0.0422	0.088	7.56397	0.448646	0.656	0.0282336	0.437272
C283A-3	0.001758	0.179	3.35594	0.784821	0.56	0.180348	0.516438	X
C283A-4	0.00095	0.102	1.35875	0.333899	0.82	0.121115	0.649591	X
C283A-5	0.00058	-0.023	1.11417	0.313754	0.86	0.300493	0.667109	X
C283A-7	0.0048	0.013	3.72633	0.830097	0.8	0.111158	0.288156	X
C283A-8	0.0024	0.068	2.90149	0.663107	0.8	0.18071	0.258796	X
C283A-9	0.00117	0.064	1.68814	0.285879	0.77	0.170696	0.591977	X
C283A-10	0.00134	0.085	2.56132	0.390363	0.78	0.220552	0.533268	X
C283A-12	0.00182	0.065	1.37552	0.342133	0.814	0.0506857	0.719948	X
C283A-15	0.00207	-0.008	0.659274	0.12639	0.814	0.0478543	0.183814	X
C283A-17	0.00159	0.164	3.25782	0.486213	0.551	0.0639566	0.567485	X
C283A-19	0.00292	0.06	4.86539	1.49438	0.66	0.220396	0.193037	X
C283A-20	0.0195	0.165	3.36608	0.759283	0.665	0.0595054	0.307718	X
C283A-24	0.0141	0.19	8.37724	1.03865	0.491	0.0657376	0.149509	X
C283A-25	0.00735	0.134	7.84629	0.808598	0.386	0.0993005	0.322604	X
C283A-26	0.00194	0.041	1.85696	0.34497	0.85	0.101435	0.515422	X
C283A-28	0.00786	0.032	4.84423	0.87568	0.652	0.0741555	0.582596	X
C283A-29	0.00133	0.024	2.5911	0.787203	0.8	0.270474	0.643225	X
C283A-31	0.00074	-0.007	1.13691	0.234516	0.72	0.15069	0.45428	X
C283A-34	0.0197	0.41	10.5111	1.23101	0.245	0.0472547	0.423478	X
C283A-36	0.0132	0.239	7.5282	1.2415	0.385	0.098302	0.200134	X
C283A-37	0.01108	0.169	8.44071	1.42939	0.368	0.0723752	0.552567	X
C283A-38	0.00914	0.133	7.66809	0.43519	0.502	0.0529604	0.431375	X
C283A-39	0.0189	0.337	9.09529	0.522406	0.375	0.0328672	0.277483	X
C283A-40	0.00354	0.085	6.92033	1.8172	0.5	0.220227	0.556544	X
C283A-41	0.00583	0.087	6.6717	0.669808	0.44	0.120322	0.341662	X
C283A-43	0.0035	0.201	5.30559	0.774473	0.53	0.150374	0.319564	X
C283A-45	0.00337	0.052	4.47459	0.926261	0.54	0.130448	0.568444	X
C283A-49	0.0105	0.2	5.92645	0.564626	0.536	0.0718047	0.284395	X
C283A-50	0.0241	0.302	5.95815	0.540216	0.553	0.0521855	0.38005	X
C283A-51	0.0125	0.079	0.557087	0.0879509	0.823	0.0216086	0.665856	X
C283A-54	0.00301	0.069	4.43894	0.841795	0.582	0.0838122	0.666618	X
C283A-55	0.0101	0.131	8.91339	1.94377	0.419	0.0883981	0.279472	X
C283A-56	0.00591	0.112	5.06442	0.910549	0.49	0.110436	0.498307	X
C283A-57	0.00504	0.101	6.75256	0.531237	0.44	0.160242	0.208453	X
C283A-58	0.0242	0.115	1.05111	0.152047	0.821	0.0229263	0.594446	X
C283A-59	0.0155	0.077	1.21635	0.132597	0.842	0.0218994	0.607529	X
C283A-60	0.0231	0.049	1.14863	0.227613	0.847	0.02621	0.636226	X
C283A-61	0.0127	0.155	2.15091	0.257361	0.715	0.0472175	0.582631	X
C283A-62	0.01559	0.218	3.75142	0.23132	0.65	0.0439659	0.442596	X
C283A-63	0.0251	0.295	8.84264	1.15379	0.415	0.0883906	0.425385	X
C283A-64	0.0269	0.313	4.06633	0.447332	0.632	0.0307208	0.519814	X
C283A-65	0.0213	0.195	10.4913	0.878272	0.352	0.0803092	0.121398	X
C283A-66	0.0292	0.278	12.0582	0.562421	0.18	0.0302152	0.185229	X
C283A-67	0.0199	0.172	10.9233	1.43023	0.265	0.0592376	0.321853	X
C283A-71	0.00077	0.017	0.75282	0.230009	0.758	0.085357	0.466308	X
C283A-74	0.000428	-0.003	0.412657	0.0698814	0.79	0.140889	0.585996	X
C283A-76	0.00075	0.057	0.920804	0.328392	0.97	0.171103	0.691857	X
C283A-77	0.00175	0.022	2.85685	1.02911	0.84	0.180782	0.540471	X
C283A-78	0.001526	0.097	1.31079	0.587319	0.72	0.15069	0.714457	X
C283A-79	0.00141	0.084	0.837724	0.134639	0.746	0.0853147	0.573694	X
C283A-80	0.00257	0.169	2.53221	0.809277	0.786	0.0953054	0.686359	X
C283A-81	0.000575	0.026	0.857056	0.245283	0.77	0.120984	0.76527	X
C283A-82	0.00147	0.015	0.857056	0.225623	0.808	0.0640714	0.644792	X
C283A-83	0.00057	0.042	1.26611	0.361689	0.68	0.270342	0.349142	X
C283A-86	0.01676	0.08	6.96358	0.768808	0.429	0.0438476	0.509653	X
C283A-87	0.0159	0.068	11.2771	1.17955	0.239	0.0941215	0.0750076	X
C283A-90	0.01137	0.063	11.0314	1.14126	0.221	0.0571711	0.382529	X
C283A-91	0.02438	0.091	8.40885	0.561247	0.369	0.0396921	0.344081	X
C283A-92	0.01367	0.118	2.55544	0.145006	0.698	0.0358313	0.567779	X
C283A-95	0.0328	0.122	12.2302	0.672718	0.173	0.0193125	0.156977	X
C283A-96	0.0205	0.061	10.1105	0.760388	0.31	0.0513755	0.241715	X
C283A-97	0.01859	0.044	10.6619	1.02068	0.273	0.0582564	0.379603	X
C283A-99	0.0359	0.129	11.6667	0.662041	0.208	0.0332612	0.283096	X
C283A-100	0.04469	0.174	13.2168	0.546626	0.152	0.0232	0.167656	X
C283A-1	0.0042	0.115	0.605529	0.168817	0.845	0.033565	0.630176
C283A-2	0.00142	0.116	2.19325	0.3093	0.59	0.150463	0.476821
C283A-6	0.000888	0.133	1.7409	0.357455	0.54	0.170343	0.506427
C283A-11	0.001075	0.105	2.17612	0.242708	0.81	0.190689	0.603816
C283A-14	0.00263	0.043	1.78553	0.131577	0.947	0.0900151	0.470276
C283A-16	0.00189	0.071	2.77849	0.424008	0.889	0.0966495	0.682998
C283A-21	0.00426	0.098	3.95097	0.50449	0.767	0.089327	0.440523
C283A-22	0.0068	0.099	3.82877	0.487391	0.739	0.0951549	0.700431
C283A-23	0.00511	0.047	3.81566	0.471464	0.72	0.110939	0.421975
C283A-30	0.00246	0.038	4.97399	1.01032	0.8	0.290441	0.456027
C283A-32	0.00683	0.106	4.95188	0.402556	0.483	0.0657139	0.441216
C283A-33	0.01627	0.343	8.75234	0.578654	0.295	0.0354938	0.339345
C283A-35	0.00566	0.129	6.08838	0.786703	0.39	0.110276	0.338366
C283A-42	0.00415	0.205	5.59886	0.668548	0.348	0.0743266	0.413158
C283A-44	0.00579	0.104	5.83337	0.932799	0.671	0.0801317	0.24456
C283A-46	0.00999	0.084	6.12183	1.15829	0.677	0.0811377	0.643362
C283A-47	0.01535	0.127	6.83542	0.621874	0.745	0.0598833	0.23568
C283A-48	0.0148	0.127	10.9663	1.0052	0.58	0.0907445	0.412072
C283A-52	0.00785	0.078	8.91339	1.31109	0.68	0.160577	0.442861
C283A-53	0.024	0.074	3.14738	0.274582	0.78	0.0383192	0.531945
C283A-68	0.0311	0.088	13.1079	5.10413	0.433	0.08544	0.140031
C283A-69	0.074	0.167	21.0221	5.98299	0.36	0.110235	0.113488
C283A-70	0.00911	0.034	7.90194	1.47625	0.614	0.0700842	0.603479
C283A-72	0.000502	-0.007	0.482326	0.163505	0.88	0.121284	0.637365
C283A-73	0.000719	0.012	0.504151	0.144511	0.914	0.0742843	0.672432
C283A-75	0.00119	0.014	0.583337	0.051905	0.877	0.0391491	0.457965
C283A-84	0.000545	0.036	0.478186	0.121933	0.67	0.110813	0.597261
C283A-85	0.000605	0.007	1.26611	0.21913	0.62	0.200384	0.26048
C283A-88	0.00987	0.122	8.91339	1.17183	0.244	0.0641858	0.414398
C283A-89	0.01156	0.029	9.94797	1.27881	0.17	0.130044	0.161709
C283A-93	0.01776	0.056	11.0314	1.3518	0.473	0.084531	0.491244
C283A-94	0.0281	0.02	22.8314	3.4375	0.346	0.0962491	0.364527
C283A-98	0.0421	0.135	11.5698	0.536038	0.191	0.0302422	0.145291
C283C-51	0.00049	-0.005	0.790194	0.247722	0.86	0.230642	0.572728	X
C283C-66	0.019	-0.033	1.88843	0.706435	0.762	0.0284299	0.369986	X
C283C-42	0.0034	0.139	2.14264	0.826596	0.768	0.0844093	0.195893	X
C283C-60	0.00076	0.02	1.07132	0.279982	0.681	0.0693506	0.551283	X
C283C-90	0.018	0.001	3.37628	1.64012	0.561	0.0718811	0.167151	X
C283C-61	0.0208	0.018	3.52586	0.976475	0.641	0.0307953	0.187644	X
C283C-38	0.057	0.063	6.63198	3.20375	0.44	0.120322	0.261982	X
C283C-71	0.00132	0.028	2.53221	0.809277	0.78	0.300405	0.29673	X
C283C-43	0.0025	0.057	2.48145	0.42657	0.748	0.0991353	0.385349	X
C283C-44	0.00138	-0.048	1.95469	0.347906	0.78	0.210579	0.627559	X
C283C-89	0.0147	-0.024	3.51474	0.827224	0.591	0.0523518	0.139129	X
C283C-64	0.015	-0.045	4.22035	0.919967	0.696	0.0339819	0.275103	X
C283C-78	0.0315	0.056	4.03686	0.540295	0.629	0.0564204	0.695095	X
C283C-80	0.0164	0.019	5.95815	1.72979	0.456	0.0587126	0.148892	X
C283C-13	0.0108	0.018	6.3667	1.75671	0.47	0.130339	0.18739	X
C283C-31	0.0323	0.064	5.54315	1.17015	0.514	0.039366	0.533694	X
C283C-95	0.01361	0.042	3.80264	0.430688	0.631	0.0428983	0.492466	X
C283C-1	0.0113	0.024	8.98527	1.54539	0.393	0.0575394	0.354991	X
C283C-82	0.0161	0.002	8.13265	2.50513	0.299	0.0286315	0.735975	X
C283C-41	0.041	0.035	7.84629	1.89338	0.547	0.0926482	0.360977	X
C283C-54	0.00279	0.054	5.92645	1.39839	0.65	0.130648	0.821505	X
C283C-87	0.051	0.045	13.5875	3.50351	0.245	0.040299	0.2118	X
C283C-67	0.0271	0.024	6.6717	1.84858	0.365	0.0525099	0.202906	X
C283C-23	0.0126	0.072	7.73731	0.83873	0.468	0.0528357	0.465243	X
C283C-88	0.0237	-0.001	8.50514	1.32333	0.385	0.0486137	0.35504	X
C283C-77	0.0239	0.028	7.18821	1.08822	0.432	0.0341123	0.390244	X
C283C-74	0.00999	0.016	6.59274	0.580854	0.53	0.0560121	0.314431	X
C283C-20	0.0123	0.111	11.9804	1.4619	0.268	0.0482983	0.352582	X
C283C-27	0.00778	0.05	8.77302	0.935799	0.397	0.0873616	0.400628	X
C283C-36	0.0329	-0.016	10.8172	1.40332	0.292	0.0622744	0.432896	X
C283C-35	0.0335	0.035	12.0974	1.29954	0.251	0.0294313	0.449843	X
C283C-32	0.039	0.016	7.57941	1.51245	0.36	0.0574529	0.246139	X
C283C-84	0.013	0.014	10.5111	1.42362	0.283	0.0334819	0.593737	X
C283C-7	0.0183	0.082	10.1288	1.14599	0.32	0.110186	0.189622	X
C283C-16	0.0217	0.022	10.3741	0.797351	0.332	0.0653383	0.350812	X
C283C-72	0.00466	0.08	4.99629	0.666807	0.669	0.0860466	0.360513	X
C283C-29	0.00899	0.063	7.05173	0.534583	0.474	0.0775814	0.351125	X
C283C-79	0.0188	0.011	10.1288	0.969647	0.323	0.0623356	0.327636	X
C283C-12	0.0184	0.121	10.3164	1.09538	0.303	0.0384802	0.680624	X
C283C-73	0.00745	0.091	6.33053	0.67472	0.48	0.110418	0.201733	X
C283C-14	0.0153	0.049	6.71189	0.833353	0.582	0.0435831	0.332154	X
C283C-15	0.021	0.105	9.60494	1.84428	0.263	0.0781772	0.466475	X
C283C-9	0.0171	0.053	9.28478	1.34451	0.309	0.0642977	0.383507	X
C283C-76	0.02492	0.044	11.4745	0.788177	0.267	0.0324425	0.454377	X
C283C-34	0.0348	0.012	11.7405	1.20325	0.224	0.0273692	0.323345	X
C283C-28	0.00627	0.074	6.71189	0.639047	0.46	0.100422	0.257942	X
C283C-94	0.01882	0.088	9.35494	0.631345	0.357	0.0604233	0.284548	X
C283C-22	0.01219	0.04	10.6011	0.746899	0.295	0.0503469	0.0826251	X
C283C-2	0.016	0.077	8.91339	1.52114	0.288	0.0513242	0.369816	X
C283C-100	0.00955	0.042	4.3353	0.314886	0.577	0.062082	0.361954	X
C283C-46	0.0277	0.048	7.42782	0.775487	0.405	0.021578	0.49568	X
C283C-63	0.0123	0.017	6.15565	0.969997	0.421	0.0566295	0.108914	X
C283C-19	0.0191	0.107	10.6112	1.25379	0.243	0.0442676	0.441223	X
C283C-24	0.0244	0.102	11.1195	0.734823	0.261	0.0383569	0.296909	X
C283C-33	0.02892	-0.005	10.1288	0.926038	0.284	0.0256371	0.36343	X
C283C-8	0.02248	0.137	10.9987	0.959688	0.245	0.0512349	0.283381	X
C283C-26	0.0195	0.044	9.68846	0.971233	0.293	0.0394378	0.199166	X
C283C-92	0.00812	0.024	6.75256	1.12338	0.379	0.0704092	0.673379	X
C283C-3	0.0224	0.105	8.57056	0.707638	0.358	0.0564559	0.525708	X
C283C-5	0.02091	0.092	10.4323	0.832731	0.266	0.0463066	0.235858	X
C283C-81	0.0194	-0.013	8.13265	1.15397	0.324	0.0464542	0.461134	X
C283C-96	0.0138	0.055	5.68456	0.632484	0.47	0.0795573	0.394504	X
C283C-11	0.00907	0.092	7.84629	0.600604	0.385	0.0664476	0.486407	X
C283C-37	0.03129	0.045	11.4509	1.01327	0.193	0.026285	0.566452	X
C283C-75	0.0221	0.029	9.60494	1.03455	0.267	0.0612333	0.26246	X
C283C-30	0.00788	0.051	8.91339	1.24136	0.279	0.0881767	0.311484	X
C283C-52	0.00489	0.026	7.47767	0.882157	0.37	0.120228	0.138037	X
C283C-86	0.0344	0.008	10.2312	0.456729	0.283	0.0246584	0.498146	X
C283C-4	0.0185	0.105	9.3628	0.909908	0.263	0.0363822	0.139833
C283C-6	0.0185	0.063	10.3644	0.557536	0.206	0.0481765	0.104253
C283C-10	0.0151	0.034	8.07372	1.02366	0.303	0.0404564	0.440948
C283C-17	0.017	0.087	10.3356	0.739304	0.201	0.0441833	0.490228
C283C-18	0.0173	0.094	10.7132	1.27724	0.167	0.0770724	0.115849
C283C-21	0.02113	0.051	14.8954	1.29431	0.244	0.0462581	0.401175
C283C-25	0.01376	0.044	7.68395	0.626845	0.568	0.0650004	0.585767
C283C-39	0.054	-0.016	14.2843	2.41897	0.375	0.0309233	0.168602
C283C-45	0.0372	-0.019	9.20804	1.02714	0.489	0.0392384	0.151606
C283C-47	0.011	0.023	21.8465	6.88508	0.376	0.0574939	0.72155
C283C-48	0.00021	0.001	0.513444	0.114613	0.58	0.16042	0.278217
C283C-55	0.000574	0.012	1.76853	0.535998	0.95	0.380475	0.60967
C283C-58	0.000432	0.039	0.605529	0.087471	0.89	0.141127	0.641344
C283C-59	0.000166	0.009	0.411134	0.064901	1.16	0.270995	0.716741
C283C-62	0.0067	-0.009	4.99629	0.997145	0.41	0.100336	0.362607
C283C-65	0.01032	-0.015	3.30615	0.282845	0.568	0.055182	0.500936
C283C-68	0.112	0.022	17.1411	4.25057	0.271	0.0334421	0.23127
C283C-69	0.0131	-0.055	2.879	0.645582	0.404	0.0388495	0.264849
C283C-83	0.01819	-0.037	9.09529	0.708062	0.217	0.0303123	0.383395
C283C-85	0.0223	-0.002	15.9624	2.0464	0.43	0.160231	0.509517
C283C-91	0.01684	0.098	5.38248	0.569423	0.46	0.0528076	0.421683
C283C-93	0.0552	0.074	9.77345	0.987581	0.707	0.0244937	0.482794
C283C-97	0.01198	0.067	7.37863	0.672709	0.558	0.0778045	0.440938
C283C-98	0.01198	0.078	4.6814	0.417712	0.493	0.0637669	0.265591
C283C-99	0.00949	0.062	4.51082	0.406686	0.496	0.0344588	0.323166
C254A-1	0.0065	-0.043	1.46602	0.311753	0.717	0.0396817	0.1129
C254A-2	0.0054	-0.048	0.795838	0.285229	0.796	0.0402796	0.205482
C254A-4	0.0284	-0.019	3.31599	0.256899	0.768	0.0221795	0.697738
C254A-5	0.027	0.007	2.85685	0.810325	0.802	0.0272265	0.0943398
C254A-6	0.065	-0.003	3.40726	0.398851	0.773	0.0215409	0.434236
C254A-7	0.0193	-0.016	2.13035	0.260508	0.746	0.0362161	0.605547
C254A-8	0.0335	0.036	0.807372	0.074267	0.7137	0.016928	0.664597
C254A-9	0.0099	0.025	1.04617	0.0711475	0.792	0.0271091	0.414659
C254A-10	0.1082	0.167	3.61745	0.258756	0.612	0.0217674	0.543617
C254A-11	0.0828	0.004	2.96323	0.245227	0.737	0.0183921	0.328998
C254A-12	0.0209	0.046	1.62416	0.121476	0.576	0.0358986	0.636193
C254A-13	1.97	0.151	9.94797	1.6264	0.186	0.0322155	0.569995
C254A-14	4.02	0.935	4.88672	1.1879	0.348	0.0504821	0.486305
C254A-15	1.51	0.155	11.606	1.84656	0.0697	0.00367467	0.582749
C254A-16	0.1544	0.186	4.34545	0.201941	0.401	0.0243582	0.382744
C254A-17	3.04	0.62	12.2437	4.45518	0.218	0.0165834	0.652107
C254A-19	0.319	0.389	0.283505	0.0626195	0.8253	0.0167946	0.659627
C254A-20	0.297	0.211	0.148755	0.0201619	0.8351	0.0170648	0.520582
C254A-21	0.00798	0.049	1.31699	0.11299	0.83	0.0325509	0.353696
C254A-22	0.0141	-0.017	1.92764	0.179648	0.789	0.0411462	0.534228
C254A-23	0.00586	0.014	0.586407	0.064185	0.81	0.0273211	0.121667
C254A-24	0.0593	0.109	2.28314	0.139601	0.657	0.0222859	0.586663
C254A-25	0.00137	-0.005	0.155177	0.0172805	0.803	0.0272383	0.536496
C254A-26	0.0082	0.024	0.595815	0.239631	0.827	0.0333852	0.305881
C254A-27	1.4	1.446	0.152002	0.0152153	0.8365	0.0171129	0.32401
C254A-28	2.21	1.41	0.586407	0.121646	0.8	0.02	0.652858
C254A-29	0.0513	0.021	2.74427	0.380767	0.747	0.0204745	0.604038
C254A-31	0.0238	0.023	3.54832	0.366129	0.81	0.0403911	0.237282
C254A-32	0.216	0.058	4.14191	1.28401	0.574	0.030262	0.36904
C254A-33	0.0069	-0.013	2.32119	0.536479	0.784	0.062015	0.250406
C254A-34	0.00183	-0.015	0.202577	0.0812584	0.881	0.0400807	0.652225
C254A-35	0.0279	0.014	1.50564	0.429657	0.755	0.0258652	0.448965
C254A-36	0.00289	0.005	0.301944	0.0596082	0.818	0.0341709	0.641379
C254A-37	0.00374	0.004	0.723489	0.137959	0.857	0.0336865	0.265825
C254A-38	0.000168	-0.012	0.0340726	0.00541149	0.864	0.0426568	0.285221
C254A-40	0.00724	-0.005	1.85079	0.234183	0.796	0.0225709	0.586692
C254A-41	0.0122	0.038	1.52626	0.214032	0.761	0.0220828	0.32531
C254A-43	0.062	0.02	2.93203	1.00691	0.68	0.0293421	0.184656
C254A-44	0.00211	0.047	0.182651	0.0541749	0.865	0.0381483	0.337223
C254A-45	0.000168	0.017	0.056557	0.0153102	0.845	0.0546773	0.331102
C254A-46	0.059	0.064	3.80264	0.915615	0.718	0.0288307	0.264747
C254A-47	0.0348	0.023	2.02577	0.48266	0.7	0.0212603	0.267143
C254A-48	0.0302	0.028	2.48145	0.275526	0.785	0.0270276	0.508682
C254A-49	0.097	0.088	5.99018	1.62026	0.69	0.0303223	0.640522
C254A-50	0.0594	0.092	4.3185	0.567356	0.702	0.0228281	0.531336
C254A-51	0.053	0.074	3.95097	0.973966	0.697	0.0349045	0.340776
C254A-52	0.114	-0.002	6.96358	3.22743	0.746	0.0335053	0.208652
C254A-53	0.0293	0.028	4.99629	1.37489	0.766	0.0319171	0.717352
C254A-54	0.0568	0.002	4.78186	0.434807	0.719	0.024633	0.461254
C254A-55	0.073	0.045	2.98706	0.332627	0.749	0.018585	0.524779
C254A-56	0.0254	0.009	1.79705	0.35197	0.827	0.0223287	0.605218
C254A-57	0.1101	0.038	5.59886	1.19355	0.747	0.0265933	0.613896
C254A-58	0.01933	0.018	2.39607	0.109381	0.822	0.0423234	0.454434
C254A-59	0.0077	0.059	0.928478	0.180125	0.809	0.0422231	0.156758
C254A-60	0.0189	0.015	3.38655	0.625907	0.815	0.0478612	0.380468
C254A-62	0.091	0.043	3.78971	0.679861	0.754	0.0300567	0.380723
C254A-63	0.206	0.123	6.3667	0.717145	0.752	0.0226981	0.525624
C254A-64	0.0341	0.056	1.29555	0.155578	0.778	0.0261364	0.523465
C254A-65	0.45	0.35	5.06442	1.4582	0.647	0.0263902	0.388324
C254A-66	0.099	0.019	3.24832	0.613884	0.727	0.0182322	0.235028
C254A-67	0.0227	0.006	1.54746	0.539315	0.815	0.0250338	0.636371
C254A-68	0.0142	0.072	1.52626	0.234499	0.748	0.0274372	0.397317
C254A-69	0.051	0.077	0.683542	0.2232	0.7499	0.0178073	0.245455
C254A-71	0.0241	0.102	0.837724	0.184382	0.789	0.0246983	0.626785
C254A-73	1.52	0.643	42.8528	2.78655	0.427	0.0245343	0.479897
C254A-74	0.227	0.247	19.111	1.49139	0.64	0.0353955	0.5455
C254A-75	0.0254	-0.019	0.960494	0.111432	0.817	0.0324191	0.418229
C254A-76	0.0743	0.047	3.1563	0.712685	0.798	0.0219025	0.676063
C254A-77	0.0141	0.063	1.06926	0.064028	0.808	0.0289335	0.614271
C254A-78	0.00221	0.085	0.293203	0.116072	0.841	0.0546527	0.110119
C254A-79	0.0266	0.128	2.53221	0.359182	0.798	0.0296601	0.565868
C254A-80	0.162	0.095	4.05154	0.979937	0.726	0.02017	0.172167
C254A-81	0.0326	0.04	2.03688	0.3114	0.793	0.0232495	0.345353
C254A-82	0.0171	0.024	0.825313	0.1009	0.824	0.0222843	0.359095
C254A-83	0.0174	0.06	2.14264	0.785522	0.799	0.0348764	0.372042
C254A-84	0.0182	0.044	2.42212	0.583742	0.804	0.0322888	0.622034
C254A-85	0.18	0.14	3.95097	0.682871	0.745	0.0191314	0.678181
C254A-86	0.023	0.051	1.18529	0.167736	0.795	0.020538	0.338742
C254A-87	0.00148	0.029	0.119804	0.0580808	0.797	0.0313542	0.115491
C254A-89	0.0402	0.061	5.68456	1.40254	0.782	0.0278138	0.491604
C254A-90	0.0276	0.048	3.44945	0.691273	0.705	0.026978	0.218225
C254A-91	0.138	0.164	1.92099	0.401602	0.7671	0.0163666	0.162741
C254A-92	0.207	0.296	9.60494	1.43681	0.674	0.0292867	0.260168
C254A-93	0.207	0.172	13.2798	1.58617	0.677	0.0217332	0.499556
C254A-94	0.166	0.092	5.38248	0.351334	0.742	0.0184723	0.434621
C254A-95	0.0382	0.056	1.54746	0.304456	0.761	0.0169676	0.456651
C254A-96	0.00725	0.076	1.50564	0.155246	0.823	0.0386773	0.588105
C254A-97	0.00482	0.015	0.819245	0.105314	0.833	0.0360771	0.602018
C254A-98	0.0366	0.033	1.4451	0.181442	0.74	0.0203725	0.0687416
C254A-99	0.0375	0.007	1.50564	0.228324	0.769	0.0214836	0.533118
Experiment Q (Agilent 7700; 110 µm)
C258-1	0.00286	n/a	2.75959	0.525646	0.79	0.180692	0.584246	X
C258-2	0.00368	n/a	4.81428	0.896356	0.63	0.160495	0.529817	X
C258-5	0.0043	n/a	4.15881	1.49839	0.93	0.36048	0.634225	X
C258-7	0.00295	n/a	3.72196	0.910613	0.82	0.270498	0.707348	X
C258-8	0.00468	n/a	5.78972	1.46682	0.65	0.210402	0.672711	X
C258-10	0.00722	n/a	4.42913	0.934589	0.69	0.110862	0.519878	X
C258-11	0.01391	n/a	2.66815	0.484838	0.626	0.0438264	0.648761	X
C258-12	0.0183	n/a	3.3554	0.428238	0.729	0.0675912	0.56942	X
C258-13	0.01533	n/a	4.89407	0.643224	0.61	0.0690857	0.670043	X
C258-14	0.0194	n/a	2.81215	0.562434	0.694	0.0654878	0.303128	X
C258-16	0.0738	n/a	5.43452	0.569161	0.521	0.0394027	0.435913	X
C258-17	0.0199	n/a	4.13938	0.490673	0.682	0.0732806	0.591636	X
C258-18	0.0421	n/a	8.56699	0.789188	0.447	0.0636312	0.463846	X
C258-21	0.0041	n/a	4.13938	1.00796	0.83	0.290475	0.420207	X
C258-22	0.0095	n/a	1.84933	0.303966	0.753	0.0706244	0.437977	X
C258-23	0.00392	n/a	1.30269	0.275996	0.728	0.0990757	0.593119	X
C258-24	0.0053	n/a	5.57124	1.91251	0.62	0.190404	0.677879	X
C258-25	0.0102	n/a	0.777041	0.115772	0.812	0.0640916	0.535341	X
C258-27	0.0045	n/a	3.7535	0.941368	0.5	0.150333	0.383212	X
C258-28	0.0151	n/a	2.92352	0.51333	0.75	0.111018	0.685784	X
C258-30	0.00605	n/a	1.03003	0.434241	0.755	0.0873156	0.671439	X
C258-33	0.0226	n/a	1.88474	0.49035	0.786	0.0514599	0.430314	X
C258-34	0.00336	n/a	0.515016	0.107917	0.88	0.111399	0.434243	X
C258-37	0.0145	n/a	1.28381	0.414332	0.84	0.0749082	0.342087	X
C258-38	0.00485	n/a	1.06726	0.187763	0.74	0.0686152	0.650387	X
C258-39	0.00483	n/a	1.47638	0.280555	0.841	0.099433	0.517384	X
C258-40	0.00408	n/a	0.714376	0.109679	0.872	0.0760273	0.447413	X
C258-42	0.0176	n/a	6.71081	0.786879	0.559	0.0916842	0.647376	X
C258-43	0.00403	n/a	0.307579	0.0878629	0.768	0.0658174	0.640317	X
C258-50	0.00272	n/a	0.393701	0.0593525	0.858	0.0633677	0.475181	X
C258-44	0.00455	n/a	0.372196	0.0925927	0.816	0.066048	0.398032	X
C258-46	0.0461	n/a	4.17843	0.5534	0.637	0.0593827	0.519034	X
C258-47	0.0161	n/a	1.73691	0.263349	0.699	0.0625815	0.731474	X
C258-48	0.0117	n/a	5.46807	0.919193	0.527	0.0767274	0.523499	X
C258-52	0.0822	n/a	5.24158	1.29835	0.522	0.0747328	0.410794	X
C258-54	0.0152	n/a	2.84832	0.309474	0.702	0.0851653	0.477501	X
C258-55	0.0124	n/a	3.23294	0.454485	0.629	0.079008	0.620342	X
C258-56	0.01275	n/a	0.641903	0.0810492	0.83	0.0414676	0.613876	X
C258-57	0.0188	n/a	2.21457	0.61899	0.708	0.0694587	0.554933	X
C258-58	0.056	n/a	5.46807	0.791309	0.508	0.0598684	0.420065	X
C258-59	0.0358	n/a	1.61059	0.360512	0.753	0.0522188	0.618893	X
C258-60	0.0933	n/a	11.1006	1.24357	0.23	0.0492154	0.172865	X
C258-61	0.0517	n/a	9.90857	0.996404	0.256	0.0363623	0.432361	X
C258-62	0.0927	n/a	6.23822	2.08819	0.4	0.110291	0.435009	X
C258-63	0.041	n/a	2.16055	0.745617	0.627	0.0720989	0.592248	X
C258-64	0.047	n/a	9.52502	1.22314	0.241	0.0432693	0.353249	X
C258-65	0.0933	n/a	10.7503	0.845253	0.176	0.0282204	0.237055	X
C258-66	0.0763	n/a	5.15016	1.10827	0.523	0.0717664	0.536731	X
C258-67	0.0338	n/a	7.63644	1.30778	0.325	0.0434885	0.373285	X
C258-68	0.0563	n/a	11.4006	1.21334	0.245	0.0383146	0.399514	X
C258-69	0.0661	n/a	11.0728	1.08004	0.213	0.0283222	0.300607	X
C258-70	0.0656	n/a	7.83918	0.920137	0.397	0.0664759	0.345744	X
C258-71	0.01295	n/a	0.656168	0.135272	0.784	0.0457697	0.613161	X
C258-72	0.0414	n/a	0.136491	0.0150911	0.82	0.0282482	0.583078	X
C258-75	0.0515	n/a	0.34468	0.0796739	0.836	0.054622	0.667712	X
C258-76	0.0077	n/a	0.0661065	0.0297839	0.9	0.111463	0.601797	X
C258-78	0.00174	n/a	1.34216	0.233543	0.81	0.180728	0.441094	X
C258-79	0.0504	n/a	0.877056	0.255618	0.758	0.0589816	0.677518	X
C258-80	0.45	n/a	0.777041	0.336243	0.727	0.0744339	0.38121	X
C258-81	0.0212	n/a	4.19823	1.38884	0.58	0.130517	0.524125	X
C258-82	0.01797	n/a	4.27936	0.61713	0.542	0.0580216	0.580272	X
C258-83	0.0171	n/a	3.01302	0.793311	0.62	0.100766	0.511669	X
C258-84	0.0222	n/a	10.4215	1.56082	0.33	0.0703105	0.574472	X
C258-85	0.0166	n/a	6.81405	0.953982	0.59	0.110631	0.59068	X
C258-86	0.00806	n/a	1.1213	0.179314	0.751	0.0599133	0.632984	X
C258-87	0.01318	n/a	6.41903	0.853403	0.401	0.0893606	0.26159	X
C258-88	0.02066	n/a	0.732088	0.208942	0.795	0.0562922	0.71369	X
C258-89	0.0048	n/a	6.76204	1.48434	0.52	0.140386	0.615149	X
C258-90	0.0187	n/a	11.5794	1.59236	0.178	0.0581092	0.333124	X
C258-92	0.00271	n/a	1.55408	0.68603	0.83	0.260529	0.461503	X
C258-93	0.00223	n/a	1.58183	0.598437	0.9	0.270599	0.545793	X
C258-96	0.0074	n/a	2.61306	0.42158	0.622	0.0779984	0.511868	X
C258-97	0.00742	n/a	2.34346	0.308316	0.666	0.0909803	0.527521	X
C258-98	0.025	n/a	5.82781	1.11239	0.51	0.0648077	0.607801	X
C258-102	0.00382	n/a	6.71081	1.11911	0.44	0.190204	0.400451	X
C258-104	0.00693	n/a	9.03905	1.45548	0.42	0.140252	0.61746	X
C258-105	0.00298	n/a	4.4071	1.39879	0.41	0.130258	0.444956	X
C258-106	0.0796	n/a	10.7896	1.33598	0.151	0.049093	0.353374	X
C258-107	0.00551	n/a	6.10915	1.50593	0.48	0.20023	0.594585	X
C258-108	0.00214	n/a	5.94515	1.6627	0.65	0.330256	0.636074	X
C258-109	0.00309	n/a	5.78972	1.42974	0.46	0.170249	0.609272	X
C258-110	0.00271	n/a	4.02649	0.794619	0.45	0.15027	0.574892	X
C258-3	0.0161	n/a	5.98532	1.09323	0.73	0.10106	0.611767
C258-4	0.00699	n/a	2.4137	0.400092	0.822	0.0777578	0.64462
C258-6	0.00669	n/a	4.78825	0.962035	0.72	0.101031	0.43773
C258-9	0.00402	n/a	3.93701	0.777731	0.394	0.0993131	0.426464
C258-15	0.0461	n/a	3.80183	0.46488	0.724	0.0482252	0.568556
C258-19	0.0785	n/a	16.9374	1.44098	0.189	0.0322225	0.327671
C258-20	0.0142	n/a	8.05297	1.23861	0.588	0.083829	0.57565
C258-26	0.0131	n/a	10.1819	1.82783	0.55	0.150403	0.476157
C258-29	0.0521	n/a	12.1346	3.21607	0.801	0.0884626	0.385638
C258-31	0.0262	n/a	2.87606	0.696667	0.816	0.0777325	0.294632
C258-32	0.0248	n/a	2.1192	0.211043	0.817	0.046	0.338315
C258-35	0.1265	n/a	20.7941	1.91721	0.697	0.0625725	0.550629
C258-36	0.0201	n/a	5.18027	0.829139	0.747	0.0715766	0.577892
C258-45	0.0626	n/a	6.76204	0.70569	0.778	0.0639227	0.406505
C258-49	0.0306	n/a	6.32733	1.04341	0.642	0.0692016	0.740926
C258-51	0.0417	n/a	4.12012	0.50395	0.743	0.0676522	0.59399
C258-53	0.0335	n/a	3.78558	0.446543	0.803	0.0601824	0.693421
C258-77	0.00218	n/a	0.44071	0.0925573	0.904	0.0937597	0.515139
C258-91	0.0846	n/a	8.51757	1.0711	0.697	0.0490237	0.592173
C258-94	0.0239	n/a	11.3568	1.5628	0.632	0.0819803	0.568003
C258-95	0.0261	n/a	18.8876	3.74549	0.472	0.0885049	0.671311
C258-100	0.00456	n/a	4.71184	0.88411	0.97	0.210894	0.622004
C258-101	0.00247	n/a	5.30435	1.3913	0.94	0.290609	0.617117
C258-103	0.00196	n/a	3.4468	0.941315	1.07	0.350654	0.626715
C273c-1	0.0512	n/a	44.2913	7.21351	0.289	0.0961738	0.438628	X
C273c-2	0.01123	n/a	19.2153	4.19629	0.68	0.25037	0.774453	X
C273c-3	0.0684	n/a	27.0069	3.18252	0.434	0.0695438	0.592416	X
C273c-4	0.1622	n/a	57.5212	5.32556	0.256	0.0612145	0.28768	X
C273c-5	0.1989	n/a	45.427	4.56542	0.396	0.0516113	0.636698	X
C273c-6	0.1695	n/a	69.2052	8.32274	0.189	0.0561274	0.35566	X
C273c-7	0.1693	n/a	60.6731	5.14517	0.177	0.0401563	0.26278	X
C273c-8	0.2758	n/a	62.8246	7.38485	0.199	0.0810977	0.18206	X
C273c-9	0.4311	n/a	65.9588	5.83456	0.096	0.0190968	0.298186	X
C273c-10	0.048	n/a	42.1822	6.19523	0.36	0.130199	0.427784	X
C273c-11	0.2391	n/a	71.4376	6.77854	0.113	0.0330773	0.274145	X
C273c-12	0.2093	n/a	63.2733	5.89274	0.14	0.0251563	0.384327	X
C273c-13	0.4	n/a	72.077	5.2459	0.109	0.0181315	0.332342	X
C273c-14	0.279	n/a	41.2012	3.0874	0.438	0.056681	0.40198	X
C273c-15	0.283	n/a	36.1562	3.46117	0.467	0.0459591	0.693273	X
C273c-16	0.467	n/a	70.7529	5.78517	0.094	0.0171036	0.295227	X
C273c-17	0.799	n/a	75.3895	5.07668	0.0659	0.00870041	0.305871	X
C273c-18	0.725	n/a	73.088	4.69957	0.07	0.0150652	0.153267	X
C273c-19	0.987	n/a	72.5493	4.72666	0.075	0.0120934	0.205087	X
C273c-20	0.525	n/a	73.8805	6.61215	0.086	0.018082	0.296905	X
C273c-21	0.1874	n/a	56.7838	6.15405	0.211	0.0372399	0.551614	X
C273c-22	0.2728	n/a	15.5408	1.08931	0.693	0.0339573	0.6362	X
C273c-23	0.2078	n/a	62.3822	6.50729	0.179	0.0321996	0.449811	X
C273c-24	0.1221	n/a	5.27278	0.434393	0.767	0.0293311	0.414258	X
C273c-25	0.0552	n/a	34.7383	4.44064	0.475	0.0984594	0.494178	X
C273c-28	0.0117	n/a	22.1457	6.1899	0.73	0.320333	0.552042	X
C273c-29	0.0142	n/a	13.2213	3.03291	0.74	0.270405	0.594237	X
C273c-33	0.00583	n/a	15.5408	3.36276	0.96	0.430428	0.451372	X
C273c-35	0.00488	n/a	5.36865	0.734119	0.75	0.111018	0.352291	X
C273c-40	0.00918	n/a	17.3691	4.5118	0.64	0.160511	0.747453	X
C273c-41	0.01719	n/a	21.9808	4.97718	0.51	0.250208	0.424971	X
C273c-42	0.01648	n/a	7.20184	1.67852	0.67	0.130689	0.655961	X
C273c-43	0.01481	n/a	22.1457	3.81812	0.52	0.1803	0.495181	X
C273c-45	0.0303	n/a	10.1819	2.16725	0.737	0.0833143	0.713097	X
C273c-46	0.01924	n/a	35.2919	8.20646	0.59	0.200348	0.553696	X
C273c-47	0.0124	n/a	20.1324	5.58217	0.62	0.300256	0.656975	X
C273c-48	0.0143	n/a	30.233	7.48041	0.7	0.240408	0.47636	X
C273c-49	0.01219	n/a	23.25	5.31569	0.62	0.280274	0.452637	X
C273c-50	0.01307	n/a	25.6019	6.34595	0.62	0.280274	0.62214	X
C273c-51	0.0132	n/a	33.177	7.63783	0.88	0.340455	0.566652	X
C273c-52	0.01142	n/a	29.0435	7.1947	0.89	0.340466	0.662033	X
C273c-54	0.0187	n/a	12.6547	3.315	0.56	0.120522	0.757467	X
C273c-55	0.0293	n/a	18.9685	3.19055	0.82	0.300448	0.468286	X
C273c-56	0.0223	n/a	15.014	4.89295	0.89	0.220719	0.758516	X
C273c-57	0.0177	n/a	33.0532	9.15373	0.75	0.370304	0.694666	X
C273c-59	0.01412	n/a	27.9441	5.98343	0.42	0.190186	0.483738	X
C273c-60	0.01542	n/a	29.8258	5.81809	0.59	0.230302	0.383333	X
C273c-61	0.1645	n/a	42.7936	3.93944	0.389	0.0624862	0.315382	X
C273c-62	0.0488	n/a	25.5281	3.68577	0.56	0.110569	0.71668	X
C273c-63	0.1462	n/a	45.1952	5.13565	0.369	0.0535113	0.561029	X
C273c-64	0.1098	n/a	38.8521	2.94636	0.376	0.0475978	0.462993	X
C273c-65	0.0711	n/a	33.3018	2.80193	0.512	0.0786693	0.507474	X
C273c-66	0.0713	n/a	30.1302	3.51608	0.443	0.0775081	0.441978	X
C273c-67	0.0813	n/a	35.8634	3.41295	0.406	0.0883738	0.417532	X
C273c-68	0.0711	n/a	30.233	2.98989	0.491	0.0756402	0.4731	X
C273c-69	0.0738	n/a	36.3044	3.48572	0.504	0.070722	0.531529	X
C273c-70	0.0527	n/a	23.4967	2.26124	0.596	0.0967372	0.541276	X
C273c-71	0.0368	n/a	20.2244	2.90591	0.51	0.110472	0.592709	X
C273c-72	0.0346	n/a	20.7454	3.60204	0.575	0.0798326	0.747024	X
C273c-73	0.0446	n/a	18.0781	4.15779	0.61	0.130571	0.543321	X
C273c-74	0.0317	n/a	19.5116	2.12782	0.595	0.0997126	0.598465	X
C273c-75	0.136	n/a	40.4487	4.21135	0.397	0.0378424	0.65976	X
C273c-76	0.0681	n/a	24.8131	2.60769	0.547	0.086693	0.589518	X
C273c-77	0.1368	n/a	39.5458	3.16521	0.417	0.0585965	0.539945	X
C273c-78	0.106	n/a	26.1306	2.79126	0.577	0.0758826	0.595227	X
C273c-79	0.0248	n/a	16.2836	1.97191	0.74	0.110991	0.572992	X
C273c-80	0.01326	n/a	16.1059	3.8911	0.89	0.210753	0.727675	X
C273c-81	0.0171	n/a	6.81405	0.905216	0.81	0.131005	0.678046	X
C273c-82	0.02835	n/a	18.7278	3.0006	0.74	0.200547	0.686765	X
C273c-83	0.0646	n/a	25.0234	2.77243	0.419	0.0635549	0.50506	X
C273c-84	0.0507	n/a	25.3819	3.78287	0.59	0.130534	0.604925	X
C273c-85	0.0258	n/a	18.3782	3.81095	0.67	0.110813	0.771329	X
C273c-86	0.0137	n/a	3.51519	0.638432	1.15	0.390678	0.55381	X
C273c-87	0.0992	n/a	37.3767	4.36318	0.488	0.0915219	0.458247	X
C273c-88	0.0156	n/a	10.5456	1.36166	0.9	0.151076	0.57661	X
C273c-89	0.1973	n/a	40.4487	3.13932	0.386	0.0407382	0.523115	X
C273c-90	0.0417	n/a	45.427	9.59119	0.69	0.220432	0.677617	X
C273c-91	0.0605	n/a	28.4832	3.76038	0.57	0.110589	0.535007	X
C273c-92	0.0825	n/a	35.2919	4.57238	0.462	0.0597192	0.703656	X
C273c-93	0.0757	n/a	34.8751	4.22147	0.61	0.160464	0.376999	X
C273c-94	0.0698	n/a	31.4123	3.99739	0.527	0.075737	0.823116	X
C273c-95	0.0704	n/a	30.6514	4.11427	0.55	0.130465	0.613796	X
C273c-96	0.1507	n/a	41.3938	3.88542	0.378	0.0446447	0.61255	X
C273c-97	0.2174	n/a	44.7387	4.84094	0.381	0.0584984	0.643774	X
C273c-98	0.1796	n/a	33.177	2.78467	0.404	0.0447357	0.57833	X
C273c-99	0.209	n/a	42.7936	4.11455	0.343	0.0613845	0.242615	X
C273c-100	0.1086	n/a	32.6873	2.43815	0.55	0.067897	0.505968	X
C304A-1	0.079	n/a	18.3782	2.21995	0.479	0.051892	0.376866	X
C304A-2	0.203	n/a	20.7454	1.59724	0.491	0.0509552	0.490586	X
C304A-3	0.217	n/a	22.8896	2.01308	0.455	0.0410221	0.395327	X
C304A-4	0.115	n/a	18.3022	1.7036	0.583	0.0513416	0.477437	X
C304A-5	0.0228	n/a	5.8664	0.722661	0.74	0.0872642	0.216505	X
C304A-6	0.095	n/a	13.6913	2.16378	0.57	0.068949	0.466574	X
C304A-7	0.395	n/a	22.4829	1.90722	0.473	0.0276675	0.255138	X
C304A-8	0.536	n/a	31.1911	3.74485	0.384	0.028071	0.49998	X
C304A-9	0.274	n/a	25.8259	2.34517	0.372	0.0367608	0.316546	X
C304A-10	0.366	n/a	31.9793	2.71445	0.373	0.0299441	0.436664	X
C304A-11	0.0159	n/a	3.20952	0.70461	0.76	0.0726088	0.309409	X
C304A-12	0.08	n/a	10.3848	0.987562	0.608	0.046614	0.507341	X
C304A-13	0.0344	n/a	4.58978	0.506781	0.667	0.0498192	0.472295	X
C304A-14	0.0192	n/a	2.89486	0.512789	0.822	0.0758042	0.32097	X
C304A-15	0.0035	n/a	0.489407	0.0795658	0.817	0.0478748	0.284887	X
C304A-16	0.00334	n/a	0.598532	0.0824606	0.849	0.0691182	0.307252	X
C304A-17	0.132	n/a	3.28084	1.46735	0.75	0.04272	0.154189	X
C304A-18	0.173	n/a	8.77056	0.742509	0.695	0.0461434	0.390096	X
C304A-19	0.0178	n/a	5.30435	0.688393	0.622	0.0977944	0.204244	X
C304A-20	0.1014	n/a	15.9608	1.42377	0.54	0.0609643	0.575578	X
C304A-21	0.0088	n/a	0.571501	0.114244	0.89	0.0559092	0.251988	X
C304A-22	0.976	n/a	23.3112	2.02533	0.46	0.0247718	0.293094	X
C304A-23	0.0116	n/a	11.213	3.17254	0.6	0.140513	0.473349	X
C304A-24	0.0335	n/a	21.7648	3.38809	0.6	0.130553	0.48629	X
C304A-25	0.0068	n/a	7.26087	1.18764	0.82	0.170789	0.398659	X
C304A-26	1.011	n/a	30.5458	2.05124	0.342	0.0155816	0.409302	X
C304A-27	0.36	n/a	18.5319	1.94128	0.489	0.0259162	0.328468	X
C304A-28	0.1256	n/a	33.4274	3.23955	0.386	0.0614866	0.590684	X
C304A-29	0.275	n/a	32.5672	3.72704	0.389	0.0397684	0.388988	X
C304A-30	0.0648	n/a	25.7508	2.71952	0.429	0.0983749	0.515846	X
C304A-31	0.091	n/a	12.8941	1.48034	0.626	0.0661948	0.31953	X
C304A-32	0.048	n/a	4.38528	0.646198	0.756	0.0493722	0.608302	X
C304A-33	0.00344	n/a	0.461368	0.0756898	0.859	0.0769425	0.322435	X
C304A-34	0.0013	n/a	0.100662	0.0324219	0.86	0.111337	0.161263	X
C304A-35	0.00194	n/a	0.149633	0.0256337	0.84	0.0424646	0.194818	X
C304A-37	0.004	n/a	0.210911	0.0611761	0.839	0.0352501	0.109796	X
C304A-38	0.00552	n/a	0.306514	0.0421288	0.853	0.0425681	0.231722	X
C304A-39	0.0512	n/a	4.47387	0.649791	0.752	0.0503011	0.241161	X
C304A-40	0.0046	n/a	0.952502	0.300811	0.773	0.0972369	0.122932	X
C304A-41	0.437	n/a	23.8125	1.45261	0.408	0.0206781	0.375553	X
C304A-42	4.06	n/a	48.3266	2.88808	0.1736	0.00684579	0.332632	X
C304A-43	0.351	n/a	11.7173	1.08602	0.575	0.031197	0.462835	X
C304A-44	0.421	n/a	15.014	1.95652	0.554	0.029185	0.18251	X
C304A-45	3.07	n/a	32.6873	2.03126	0.3509	0.0120537	0.464585	X
C304A-46	0.367	n/a	12.1346	0.912474	0.565	0.0283494	0.396537	X
C304A-47	1.712	n/a	27.7689	1.73751	0.393	0.0169346	0.491842	X
C304A-48	2.48	n/a	37.2823	2.274	0.311	0.0126368	0.478898	X
C304A-49	3.81	n/a	43.3591	2.94618	0.2335	0.00792268	0.422456	X
C304A-50	1.619	n/a	24.7438	1.65939	0.439	0.0133075	0.362437	X
C304A-51	0.708	n/a	21.6584	1.44266	0.519	0.0207785	0.516849	X
C304A-52	2.73	n/a	36.5893	2.36339	0.353	0.0156794	0.385322	X
C304A-53	0.0236	n/a	6.37285	0.970744	0.7	0.0792465	0.45952	X
C304A-55	0.00307	n/a	4.21822	0.791901	0.68	0.160577	0.458087	X
C304A-56	0.00121	n/a	0.093245	0.0395369	0.89	0.180878	0.0784775	X
C304A-57	0.00126	n/a	0.233112	0.0988422	0.8	0.130981	0.23095	X
C304A-58	0.00219	n/a	0.408215	0.0461453	0.785	0.0581592	0.298813	X
C304A-61	0.0511	n/a	6.86687	0.725206	0.72	0.0434553	0.371186	X
C304A-62	0.262	n/a	20.1783	2.21908	0.507	0.0432067	0.34897	X
C304A-63	0.488	n/a	32.8084	2.19481	0.405	0.0310743	0.584575	X
C304A-64	0.00322	n/a	0.45427	0.0668744	0.865	0.0828269	0.420857	X
C304A-65	0.00301	n/a	0.564221	0.0705717	0.794	0.0766627	0.44302	X
C304A-66	0.0458	n/a	2.76821	0.445907	0.798	0.0649902	0.543906	X
C304A-68	0.0079	n/a	0.952502	0.230301	0.805	0.056349	0.219645	X
C304A-69	0.017	n/a	2.07941	0.238616	0.734	0.0559598	0.50565	X
C304A-70	0.0501	n/a	6.41903	0.603994	0.744	0.0589102	0.596858	X
C304A-71	0.5	n/a	31.3013	2.36246	0.385	0.0271162	0.459753	X
C304A-72	0.0638	n/a	10.0662	1.24972	0.671	0.0469585	0.204638	X
C304A-73	0.0085	n/a	0.720184	0.0949226	0.79	0.055305	0.482024	X
C304A-75	0.1746	n/a	16.7453	1.15207	0.637	0.0467687	0.497151	X
C304A-76	0.625	n/a	27.425	1.81475	0.406	0.0197468	0.323484	X
C304A-77	0.00312	n/a	0.354331	0.0840922	0.76	0.0560985	0.204962	X
C304A-78	0.199	n/a	16.1059	1.19175	0.614	0.0476109	0.505412	X
C304A-79	0.0232	n/a	5.12039	0.867378	0.765	0.0667764	0.20511	X
C304A-80	0.072	n/a	5.8664	1.05184	0.73	0.0578719	0.226823	X
C304A-81	0.053	n/a	9.11345	0.830076	0.671	0.0614825	0.336306	X
C304A-82	0.0463	n/a	6.46589	1.17794	0.692	0.0596284	0.353974	X
C304A-83	0.022	n/a	3.04408	0.87118	0.84	0.0846832	0.257473	X
C304A-84	0.477	n/a	35.6613	2.28021	0.372	0.0280063	0.477989	X
C304A-85	0.799	n/a	37.535	2.79235	0.337	0.0211052	0.443871	X
C304A-86	0.627	n/a	36.0092	2.51538	0.326	0.0229458	0.552295	X
C304A-87	0.477	n/a	25.8259	2.6675	0.444	0.0303291	0.338122	X
C304A-88	0.0627	n/a	6.63044	0.491083	0.748	0.0550709	0.389351	X
C304A-89	0.0317	n/a	3.93701	0.495705	0.766	0.0465908	0.426725	X
C304A-90	0.217	n/a	6.76204	3.06421	0.628	0.0721024	0.239279	X
C304A-91	0.0316	n/a	6.37285	1.27825	0.725	0.0578468	0.214287	X
C304A-92	0.044	n/a	6.19459	1.00208	0.657	0.0672953	0.311738	X
C304A-93	0.194	n/a	24.0714	2.08349	0.463	0.0371719	0.514374	X
C304A-94	0.0388	n/a	4.47387	0.713815	0.759	0.0677232	0.219662	X
C304A-95	0.2	n/a	22.0355	1.8014	0.497	0.0519596	0.510267	X
C304A-96	0.0331	n/a	4.08215	0.529985	0.716	0.0704703	0.1366	X
C304A-97	0.1406	n/a	17.8594	1.21788	0.602	0.0456176	0.470404	X
C304A-98	0.438	n/a	5.98532	1.48633	0.701	0.0358547	0.588844	X
C304A-99	0.302	n/a	14.2875	1.43487	0.602	0.0436917	0.618796	X
C304A-100	0.26	n/a	26.2857	2.22389	0.457	0.029454	0.476038	X
Reference Materials
ASH15-1	0.405	-0.012	335.312	35.984	0.69	0.110862	0.741256
ASH15-2	2.728	0.027	1423.17	125.981	0.225	0.0531907	0.28965
ASH15-3	0.506	-0.025	535.545	48.6436	0.69	0.120791	0.470985
ASH15-4	0.272	0.011	448.413	71.238	0.68	0.0949787	0.656468
ASH15-5	2.867	-0.003	1363.09	115.883	0.351	0.038643	0.5534
ASH15-6	2.073	0.004	1329.41	124.093	0.307	0.045417	0.430876
ASH15-7	3.519	-0.02	1717.33	141.307	0.159	0.0331529	0.263647
ASH15-8	2.785	0.025	1656.89	133.329	0.168	0.0511106	0.235039
ASH15-9	1.559	0	1533.24	116.24	0.345	0.0554311	0.411558
ASH15-10	2.731	0.016	1902.36	164.743	0.217	0.0621517	0.172542
ASH15-11	0.873	0.01	768.707	82.6863	0.595	0.0937583	0.489495
ASH-15-1	2.613	-0.018	1645.75	148.801	0.302	0.0345323	0.570765
ASH-15-2	1.516	-0.031	1587.14	153.274	0.27	0.100146	0.197329
ASH-15-3	2.123	-0.003	1612.41	205.485	0.257	0.0951389	0.408935
ASH-15-4	1.325	-0.028	1392.72	203.767	0.37	0.13021	0.343787
ASH-15-5	0.72	0.01	1003.76	187.692	0.57	0.140463	0.503893
ASH-15-6	0.935	-0.016	1280.66	215.802	0.41	0.110305	0.535392
ASH-15-8	1.041	-0.006	1195.46	140.351	0.38	0.100288	0.315685
ASH-15-9	0.823	0.023	1545.32	157.435	0.42	0.11032	0.375689
ASH-15-10	1.062	-0.031	1211.06	181.525	0.364	0.0942815	0.496057
ASH-15-11	1.068	0.041	1114.17	124.568	0.37	0.140195	0.328643
ASH-15-12	0.825	-0.001	1375.52	247.493	0.46	0.180235	0.103617
ASH-15-13	1.02	-0.056	1419.33	161.116	0.37	0.110249	0.409916
ASH-15-14	3.557	-0.025	1850.79	174.186	0.208	0.0292969	0.454912
ASH-15-15	4.09	0.01	1835.54	154.255	0.172	0.0391514	0.283785
ASH-15-16	4.038	0.048	1645.75	105.258	0.227	0.0293532	0.416441
ASH15-1	0.564	n/a	851.757	153.448	0.61	0.230323	0.515366
ASH15-6	1.135	n/a	995.311	240.064	0.54	0.190307	0.649149
ASH15-7	1.364	n/a	1054.56	171.511	0.3	0.110164	0.429218
ASH15-8	2.97	n/a	1408.31	213.456	0.281	0.0682318	0.579604
DB-1	3.11	-0.014	13.6145	0.880008	0.6404	0.01406	0.28299
DB-2	7.02	0.021	39.7887	3.43645	0.447	0.025611	0.515379
DB-3	13.22	0.043	53.4532	2.87592	0.3602	0.0104718	0.382838
DB-4	15.89	0.047	59.6936	3.39039	0.309	0.0117555	0.408052
DB-5	16.16	0.055	64.3875	3.26607	0.2806	0.00977213	0.217133
DB-6	2.82	-0.009	9.04	2.14543	0.671	0.0208829	0.121932
DB-7	13.62	0.043	50	2.63757	0.39	0.0113899	0.456175
DB-8	13.31	0.029	65.3557	3.44675	0.2865	0.011266	0.323575
DB-9	9.91	0.058	52.8037	3.78649	0.372	0.021339	0.354253
DB-10	13.45	0.028	62.3276	3.15876	0.2863	0.0071608	0.491476
DB-11	23.01	0.006	64.4609	3.30589	0.2922	0.00661531	0.552022
db-1	4.48	0.035	20.3688	1.77377	0.598	0.0169423	0.343243
db-2	11.14	0.043	63.6307	3.38739	0.2801	0.0077809	0.413014
db-3	16.04	0.038	66.0446	3.38497	0.2585	0.00784467	0.454987
db-4	12.54	0.049	65.0802	3.31037	0.2825	0.00781553	0.141872
db-7	16.03	0.058	56.5857	3.08738	0.3309	0.00913717	0.387131
db-5	11.28	0.05	59.6772	3.19805	0.3034	0.00867529	0.438743
db-6	12.09	0.044	51.7979	3.31608	0.349	0.0165445	0.177992
db-8	16.01	0.053	62.594	3.62474	0.284	0.0169783	0.130457
db-9	15.98	0.099	57.0785	2.96112	0.3072	0.0089442	0.439823
db-10	13.52	0.032	52.4564	2.86819	0.3516	0.010281	0.49456
db-11	16.63	0.076	55.542	3.10304	0.3212	0.0103382	0.239283
db-12	14.4	0.069	55.9043	3.27735	0.314	0.0118084	0.501079
db-13	16.85	0.066	57.1664	3.04712	0.3091	0.00926429	0.432575
db-14	17.52	0.057	58.2727	3.33143	0.309	0.0126171	0.159275
db-15	16.6	0.039	54.3764	2.756	0.3281	0.0070221	0.39965
db-16	17.54	0.079	61.6587	3.28214	0.2954	0.00820941	0.378365
DB-1	15.03	0.52	62.6395	3.43172	0.2949	0.0077972	0.52853
DB-2	1.256	0.29	11.2367	0.659026	0.636	0.0189156	0.533125
DB-3	13	0.076	49.2126	2.80387	0.3673	0.0113866	0.354106
DB-4	18.7	0.049	67.9662	3.48718	0.2858	0.00697658	0.488817
DB-7	20.04	0.063	69.4766	3.50956	0.2697	0.00568641	0.445452
DB-8	17.9	0.02	55.4798	3.35223	0.332	0.0137146	0.508061
DB-9	18.63	0.075	66.6871	3.39289	0.28	0.00688186	0.459986
DB-1	5.06	n/a	33.8102	2.29256	0.492	0.0163042	0.512533
DB-2	4.4	n/a	14.0385	2.16382	0.632	0.0228204	0.157957
DB-4	10.2	n/a	47.0434	3.35931	0.403	0.0206389	0.527435
DB-7	3.33	n/a	17.9681	1.65084	0.603	0.0200361	0.393419
DB-8	12.38	n/a	57.1501	4.214	0.3278	0.00923207	0.341529
DB-3	15.34	n/a	71.553	3.7969	0.2691	0.0109186	0.277203
WC1-1	3.379	-0.013	22.6136	1.16282	0.1335	0.00394194	0.487537
WC1-2	3.494	-0.012	21.6061	1.18862	0.1347	0.00395824	0.234542
WC1-3	3.82	-0.011	21.4829	1.11585	0.1366	0.00405756	0.575411
WC1-4	3.867	-0.026	23.7895	1.22095	0.1192	0.00352753	0.340749
WC1-5	3.883	0.011	22.4831	1.15575	0.1326	0.00488294	0.239115
WC1-6	2	0.004	22.2441	1.1953	0.117	0.00289233	0.210024
WC1-7	3.695	0.022	21.5814	1.11384	0.1443	0.00381825	0.353026
WC1-8	4.004	-0.009	21.7643	1.10236	0.1384	0.00446227	0.366661
WC1-9	4.46	0.025	20	2.0948	0.183	0.0431555	0.261586
WC1-10	3.55	0.013	20.9182	1.08445	0.1424	0.00331679	0.458652
WC1-11	4.135	-0.024	22.1438	1.13448	0.1391	0.00360964	0.357814
WC1-12	4.368	0.022	22.2004	1.24645	0.134	0.00312128	0.450644
WC1-13	3.949	0.009	22.2048	1.11558	0.1332	0.00316021	0.472179
WC1-14	3.57	0.003	22.0703	1.1655	0.1197	0.00415827	0.568415
WC1-15	3.582	0.001	22.7823	1.22823	0.1311	0.00376363	0.386186
WC1-16	3.653	0.003	21.7684	1.13651	0.155	0.00622656	0.315635
WC1-32	2.634	-0.003	20.7721	1.43677	0.164	0.0182964	0.314364
WC1-17	3.41	0.007	22.023	1.15092	0.1358	0.00483494	0.234369
WC1-18	3.791	-0.021	22.2616	1.14686	0.1274	0.00317841	0.320435
WC1-19	3.036	0.005	21.7057	1.11012	0.1342	0.00340791	0.362861
WC1-20	3.81	-0.014	19.4459	1.00759	0.1747	0.00435523	0.398642
WC1-21	3.93	-0.001	21.0076	1.08637	0.1418	0.003359	0.338448
WC1-22	3.8	-0.029	21.6641	1.09035	0.1525	0.00376065	0.359737
WC1-23	4.28	-0.01	21.3691	1.09652	0.1427	0.00379412	0.306284
WC1-24	4.352	0.044	21.7601	1.10799	0.1351	0.0031923	0.498099
WC1-25	4.24	-0.005	22.288	1.1561	0.1238	0.00324663	0.489794
WC1-26	4.02	0.032	22.0876	1.14273	0.1408	0.00418806	0.37246
WC1-27	4.026	0.023	21.735	1.14208	0.1286	0.00358681	0.334799
WC1-28	3.613	0.006	21.2286	1.07785	0.138	0.00422583	0.388818
WC1-29	2.907	0.007	21.3047	1.12883	0.1365	0.00509342	0.361324
WC1-30	2.911	-0.02	20.9337	1.10963	0.1566	0.00400742	0.269572
WC1-32	3.67	0.015	21.3934	1.13541	0.1402	0.00555899	0.485124
WC1-31	4.146	0.011	21.6766	1.14	0.1483	0.00357731	0.499556
WC1-1	4.02	0.008	23.7109	1.2328	0.1057	0.00400362	0.454181
WC1-2	4.885	0.009	23.4119	1.21479	0.12	0.00283019	0.390889
WC1-3	4.232	0	22.577	1.15459	0.1247	0.00319688	0.588874
WC1-4	4.85	0.006	23.3188	1.24422	0.1051	0.00721307	0.271462
WC1-5	4.137	-0.029	23.8683	1.24593	0.0862	0.00256558	0.292419
WC1-6	4.28	0.021	23.7361	1.22373	0.1056	0.00297835	0.506251
WC1-7	4.413	0.001	22.7987	1.15511	0.1187	0.00286284	0.489969
WC1-8	4.204	0.003	23.0917	1.1933	0.1079	0.00294227	0.564536
WC1-9	3.932	0.023	23.5904	1.26953	0.094	0.00432948	0.299853
WC1-10	4.822	-0.024	22.5907	1.20719	0.1003	0.00360888	0.228418
WC1-11	5.098	0.04	22.8971	1.16878	0.1167	0.00277445	0.255318
WC1-12	4.082	-0.039	21.6807	1.10772	0.1375	0.0042193	0.265222
WC1-13	3.7	0.026	22.0105	1.11222	0.1153	0.00264719	0.550517
WC1-14	3.853	0.033	22.9537	1.15701	0.1024	0.00279362	0.398142
WC1-15	4.079	-0.001	22.3999	1.15537	0.1114	0.00299399	0.430525
WC1-16	4.58	0.03	20.9825	2.30712	0.146	0.0411038	0.214982
WC1-32	4.47	0.008	24.3962	1.24431	0.0987	0.00267146	0.275953
WC1-17	4.049	0.021	21.8423	1.11544	0.1326	0.00378459	0.46382
WC1-18	4.706	-0.002	22.4722	1.13962	0.1227	0.00379896	0.273268
WC1-19	4.52	0.025	23.4365	1.20169	0.0871	0.00288523	0.406349
WC1-20	4.28	-0.018	23.8632	1.21323	0.0862	0.00264049	0.510072
WC1-21	5.03	-0.066	23.0439	1.16103	0.123	0.00323444	0.303606
WC1-22	4.902	0.043	23.2701	1.17035	0.1093	0.00249371	0.400142
WC1-23	5.146	-0.025	23.2507	1.17783	0.0944	0.00223708	0.361458
WC1-24	3.295	-0.012	22.1991	1.12925	0.1324	0.00378179	0.399526
WC1-25	4.093	0.015	21.6051	1.09192	0.1414	0.00481743	0.281883
WC1-26	4.609	-0.014	23.1108	1.17917	0.1033	0.00372537	0.188112
WC1-27	3.833	0.006	24.0694	1.26349	0.1172	0.00498541	0.261452
WC1-28	4.386	0.018	23.6154	1.20597	0.1159	0.00699522	0.245332
WC1-29	4.592	0.018	24.1896	1.27529	0.0904	0.00255125	0.589451
WC1-30	3.598	0.003	20.2577	4.89414	0.156	0.0780624	0.239776
WC1-32	4.06	-0.044	24.1477	1.27286	0.085	0.00240416	0.426879
WC1-31	4.688	0.041	23.7058	1.46292	0.092	0.0121402	0.182047
WC1-1	3.9	0.018	21.9264	1.10971	0.1088	0.00316622	0.483912
WC1-2	4.69	0.3	22.4734	1.2006	0.159	0.0104934	0.34497
WC1-3	4.82	0.1	22.5497	1.15777	0.1418	0.00405622	0.444847
WC1-4	5.09	0.005	22.86	1.28627	0.131	0.00538093	0.446916
WC1-5	4.98	0.017	22.4972	1.15282	0.1242	0.00312734	0.41445
WC1-6	5.3	0.039	23.2908	1.22582	0.1223	0.00451917	0.492717
WC1-7	5.18	0.01	22.9241	1.21414	0.0889	0.0069319	0.264519
WC1-8	4.4	-0.003	22.9143	1.17748	0.1155	0.00470596	0.51478
WC1-9	4.51	-0.013	22.7524	1.16762	0.118	0.00279635	0.465246
WC1-10	5.01	-0.004	23.8286	1.20859	0.1356	0.00320077	0.432287
WC1-11	4.95	0.007	23.7699	1.19987	0.1344	0.00279338	0.518388
WC1-32	4.62	0.007	23.554	1.19606	0.0968	0.00238916	0.407313
WC1-17	5.01	-0.01	22.9093	1.42007	0.112	0.0221137	0.209259
WC1-18	4.28	-0.019	23.6431	1.20991	0.1132	0.00308799	0.471521
WC1-19	4.39	-0.003	24.0605	1.22259	0.0727	0.00216197	0.414708
WC1-20	4.52	-0.012	23.2653	1.20272	0.0914	0.00224312	0.481335
WC1-21	6.11	0.012	21.1037	1.06713	0.088	0.00244696	0.52805
WC1-23	5.597	0.013	22.6072	1.14282	0.1346	0.00323834	0.382667
WC1-22	4.89	0.001	22.3083	1.14799	0.0779	0.00202913	0.398234
WC1-1	4.02	n/a	21.2939	1.25554	0.137	0.00452411	0.313931
WC1-2	4.72	n/a	22.8306	1.31226	0.1111	0.00365339	0.33246
WC1-3	4.87	n/a	22.7719	1.30807	0.1311	0.005122	0.328135
WC1-4	4.31	n/a	21.5687	1.18388	0.1323	0.00463048	0.419824
WC1-5	4.63	n/a	21.8723	1.29958	0.1392	0.00495587	0.285165
WC1-6	4.16	n/a	20.9912	1.20742	0.139	0.00409004	0.40555
WC1-7	4.47	n/a	22.1457	1.23064	0.1254	0.00523928	0.370463
WC1-8	4.44	n/a	22.5401	1.32054	0.1292	0.00501668	0.364244
WC1-9	4.43	n/a	21.8184	1.38904	0.1264	0.00551369	0.486072
WC1-10	4.69	n/a	24.8828	1.46254	0.0711	0.00287612	0.275339
WC1-11	4.11	n/a	21.9808	1.25214	0.137	0.00668712	0.382705
WC1-32	4.5	n/a	23.4346	1.38795	0.0793	0.00458316	0.242455
WC1-17	4.99	n/a	23.8125	1.57053	0.1198	0.00554444	0.445877
WC1-18	3.56	n/a	19.2991	1.0889	0.1598	0.00610364	0.335546
WC1-19	4.39	n/a	22.9489	1.41754	0.08	0.00403113	0.346744
WC1-20	3.97	n/a	21.3452	1.31692	0.11	0.0201206	0.132959
WC1-21	3.96	n/a	21.3452	1.25942	0.1026	0.00758292	0.315924
WC1-23	4.39	n/a	22.4374	1.24014	0.1224	0.00486135	0.403883
WC1-22	4.12	n/a	21.7862	1.16673	0.1274	0.00588067	0.449359
